# Supplementary material for: Persistent Exposure to Fusobacterium nucleatum Triggers Chemokine/Cytokine Release and Inhibits the Proliferation and Osteogenic Differentiation Capabilities of Human Gingiva-Derived Mesenchymal Stem Cells
Source: Front Cell Infect Microbiol. 2019 Dec 17;9:429. doi: 10.3389/fcimb.2019.00429 (PMC6927917; doi:10.3389/fcimb.2019.00429)
Supplement: Supplementary Table 4 — The union 999 DEGs list of GMSCs infected by F. nucleatum at day 3, 7, 14, and 21 (absolute of the fold-change of DEGs >2 and an adjusted P < 0.01). [file Table_4.XLS]

geneid	T3C	T7C	T14C	T21C	T3F	T7F	T14F	T21F
ENSG00000087074	56.3363736371	41.2996177889	43.6301803918	55.1722307719	189.921803539	172.609641244	85.1718734862	208.213937986
ENSG00000137331	63.7437454148	297.468475545	522.67153403	99.3051806207	331.265587167	239.386699622	495.412815876	1677.96571801
ENSG00000162892	6.93944307436	26.9110134905	51.334493056	0.868856610762	172.888918683	62.9875328139	73.7054518929	85.387889348
ENSG00000117114	9.45402667379	9.43875304919	8.462872478	9.23625245316	3.70998174308	7.17338318057	6.33116471728	7.98003465917
ENSG00000116717	50.4087653197	38.9671938973	27.2265922793	70.9473759079	251.458498047	260.334063416	129.196751573	93.0700382297
ENSG00000147872	20.9133340909	10.7232356477	98.9188359081	12.5510080909	61.5794452999	60.0723589298	132.351947387	240.893118723
ENSG00000102554	1.64862246782	1.86072692715	1.07107992359	2.09313045595	13.2216682139	7.23356483688	3.04796365329	3.37552439035
ENSG00000116761	0.994734702203	1.0685049251	0.661750100604	1.95614544942	5.26551424817	4.51045243894	4.55807779291	4.62047982864
ENSG00000130766	9.66307971361	8.82558058317	8.10433388413	28.0190830216	37.6564639961	28.2701643809	27.3439506476	17.925711979
ENSG00000164400	4.33172071429	2.0436799653	7.78999658525	4.38652887781	43.4814076042	8.135986769	18.6040486184	55.6764191167
ENSG00000150630	28.5396228814	20.9469861442	25.0791585176	29.8618411125	63.2373421822	42.8542846562	32.7193609163	28.7844169259
ENSG00000182261	1.41758159934	8.44891849998	1.60766873247	2.05765607637	5.05845664509	7.08071570673	2.74633832813	3.01272139576
ENSG00000185507	4.87155835895	3.78281642697	3.00739328063	2.55049441168	24.9641402351	7.7262149386	2.81086738744	2.65805535558
ENSG00000168062	1.19440738749	0.915479123262	0.483806699112	0.607896468279	5.52922436315	1.9203317283	0.459304295843	0.46751010134
ENSG00000115963	429.391155595	218.740510196	295.36868799	454.144405649	918.406060974	597.762681879	639.351022788	641.0652744
ENSG00000023608	6.46763907722	6.62923649198	7.08071391454	7.003581341	26.3237219794	19.7869431677	15.3002292756	14.009355405
ENSG00000074935	1.89084128669	1.29983932967	1.84987643412	3.61560642418	7.28118638269	4.30533432988	5.0677715221	5.06974264294
ENSG00000175197	14.0257920582	12.3488865096	14.9703467565	51.1455360723	92.6582524841	33.1270017891	45.520008393	81.457785007
ENSG00000138685	18.6465054422	29.202872053	13.5627759181	21.4839540657	68.4093931089	44.1644556456	43.57566469	42.5008279113
ENSG00000164284	2.98797849328	2.40483396544	2.40614944011	3.83685002832	8.80444446286	6.41702083753	5.77270480166	4.6520227986
ENSG00000177426	8.18830895255	12.392254535	8.31337461721	8.82323960367	21.989512063	17.5760681909	13.2882601914	18.3320296821
ENSG00000131018	2.13342779976	4.13418815081	3.39970176908	3.29414816008	4.77301681319	4.6517378952	4.05742463971	4.05684118635
ENSG00000170802	3.88303367219	4.56592278572	4.28442485444	4.92671770233	7.91481738889	7.420251215	7.15721560448	6.11720467322
ENSG00000159200	7.84276590033	23.3681506001	75.9991922458	10.3822522733	17.697039995	13.4045493419	35.4802521795	17.9666996118
ENSG00000165633	3.82998054374	7.95557619415	6.85831202413	3.61703250658	1.38654217678	1.95888937174	2.13538662288	1.82661692941
ENSG00000006652	5.84828412496	5.24349482192	6.6406253477	9.12891103233	20.0971962468	9.7217969794	13.6358640256	16.0268320417
ENSG00000149968	174.58157407	438.236467152	852.835319833	19.8762198792	466.110692306	691.351991016	388.347880992	826.895449933
ENSG00000128965	6.24257227691	3.04991245479	1.88323997547	12.6091541143	42.1551516948	46.0568563499	34.8233717108	18.9227516693
ENSG00000138449	3.69212437072	11.3431979996	14.7612076827	13.5877698533	1.25174432367	2.41487123508	4.07997011118	5.49344608263
ENSG00000189060	67.361781912	97.370260842	95.9632503215	58.6440246103	186.230927656	256.585929726	100.048466491	165.819414561
ENSG00000177575	0.312822796842	0.30770503471	0.404362275681	0.0758474031122	1.1229323843	3.85361804583	1.79477566613	1.10733646413
ENSG00000166189	11.9279664624	10.8402722745	9.99878478484	10.5702620692	5.06294666187	14.4606208954	7.29123322743	6.22509993516
ENSG00000177675	1.12928436433	1.68974408511	1.35445885684	0.772789062544	2.90039593215	5.18156334699	3.48672815264	2.93925560464
ENSG00000101255	13.8772340759	8.25672483146	5.28715877122	38.9809938751	110.784083104	53.4638697978	33.7152331976	30.3027034869
ENSG00000006459	0.56612714233	2.83783669455	2.86610185316	1.02771905212	1.30683514698	2.13641768279	2.71141859814	6.12644274706
ENSG00000187608	83.0273821866	34.0941665461	29.3285557032	26.1396627347	351.924646766	123.800246254	43.5464866677	19.3541500926
ENSG00000173334	2.90774814769	7.15825889665	1.40270037176	2.90272922187	6.78180336977	6.27169571977	3.21669800717	3.52580206309
ENSG00000156463	0.154960419129	0.26354629531	0.150628652846	0.217308862072	0.66983299084	1.6592221671	0.464612521346	0.375967446943
ENSG00000130513	13.5843617692	7.42072352033	4.30122445724	15.1393960027	372.282344177	104.494241215	22.034339283	34.8329942476
ENSG00000211445	18.8080025301	56.734440229	30.443383033	17.6457354469	4.54317463643	6.95367861797	5.88495134346	12.868671425
ENSG00000175556	0.359895786721	0.521410303117	0.0687854751175	0.153462297248	1.98923463365	0.812497596199	0.31619366283	0.385672497632
ENSG00000134363	103.215327453	55.6379492646	26.3153049388	48.2912894667	258.547369581	35.8685017911	42.4059980127	56.0701098811
ENSG00000229644	5.65539094376	8.03694192114	9.69993313265	9.14484349373	22.8176502333	19.6587556053	18.3393373487	43.1551582655
ENSG00000120217	0.810575116524	1.28801172502	0.50566116063	3.51686183068	3.26523516321	2.15499961212	1.09127403629	1.85633135383
ENSG00000148677	0.496531919531	3.10591499707	1.09093970213	1.67658168341	3.54714693378	19.2350866641	1.21732056294	2.3835080048
ENSG00000130066	9.95405397553	50.3524033172	47.697722095	40.8527544487	35.3501476882	58.3154421711	56.4804830918	295.457531569
ENSG00000154642	2.4849787487	2.43116133728	1.71927298428	2.36761310519	5.38508773991	2.98040272054	2.34282301836	1.79065026432
ENSG00000153714	7.14386301489	6.16919526836	7.47495667152	16.9962024035	25.0985874376	19.8241218665	14.5412611983	18.0366611926
ENSG00000164741	15.1530109597	10.4340047935	7.04233304741	6.32113124651	32.0554511645	21.112170969	13.3314707014	9.46411198925
ENSG00000258183	0.176791440923	0.509059255486	1.64652404029	0.171709950337	3.77937145067	6.9093984783	3.11665104813	12.2873216868
ENSG00000176697	3.00413910655	2.86724764943	2.95706998436	2.81106272364	8.71524629493	8.57614840386	7.57492844297	4.96458297524
ENSG00000116584	13.1723112735	8.83727421325	9.15680472763	17.7132047149	32.7008877422	28.2912802289	19.3870032986	17.8889339352
ENSG00000074047	0.534164073456	0.491017810342	0.483741169289	0.347926800136	0.136990488096	0.315748363099	0.278079480889	0.206531741167
ENSG00000168003	37.3996258519	32.7027825219	18.7486165329	42.4492868643	157.258212137	159.639771017	73.1426845209	44.5499937007
ENSG00000103257	18.4883425936	11.4382885866	16.3429134167	17.7285891986	111.953576632	98.4703839741	45.1649738223	39.151436343
ENSG00000112715	10.8373374577	27.4912908037	61.4659144499	20.5110345152	28.971667909	34.2282245206	47.6695238333	63.6950281678
ENSG00000250251	4.36119452897	2.97177098089	4.89401446569	3.12755051406	9.1026967909	6.64267033769	7.82942308077	6.77182691407
ENSG00000145777	0.240253385642	0.135193167157	0.0877302859987	0.719475982529	1.56200660598	0.872371148608	0.573835708612	0.483300450073
ENSG00000163393	6.17007662905	4.58002682307	3.28488896389	5.41115221567	13.7852070517	11.4543280104	9.12429249305	8.59006415939
ENSG00000198108	3.33321065249	4.46796748829	3.72659610911	3.3643243741	0.557675288378	3.14237401673	2.33122463681	1.70146749774
ENSG00000106070	3.14205210413	2.74043695992	3.69448334096	3.2541284719	7.09040242783	6.00315678656	4.78374429737	4.33581544091
ENSG00000136213	1.83211300254	2.01083592469	1.85456092771	1.51781483194	0.8488114075	1.55507593782	1.79740789028	1.33270373579
ENSG00000170425	7.4537687388	3.61100138805	4.92366083906	3.11602774895	15.50481708	10.9551148819	4.06321560836	4.56631713044
ENSG00000164877	3.58945664899	3.01295536593	3.63700971191	3.89568602892	1.55950064312	1.65872079693	1.46160864618	1.87041275812
ENSG00000105835	13.8074957783	19.6913346658	23.5089568633	22.6532618257	55.1846209993	50.5447253675	44.0470357637	106.921258348
ENSG00000152463	0.250529602897	2.86048333275	1.41746139002	0.1920736425	4.19863195393	9.47876834593	9.89421015102	7.34948369317
ENSG00000185100	0.625787861893	0.654632966878	0.561546953302	0.488002806408	0.150939723875	0.196647004078	0.462488872703	0.639206700855
ENSG00000162772	0.760402015536	3.47499641075	1.60726346385	3.11966337905	13.3905064919	4.02685877116	2.93593393104	27.950101761
ENSG00000147642	0.589633667923	0.81584920395	0.913135069613	1.62872161595	1.70190445808	2.07614886519	1.75674951406	1.81410495601
ENSG00000110619	7.66376686836	4.86498899097	5.19265686718	7.75476529256	16.4351670957	11.8988499078	9.69318660596	9.85381784388
ENSG00000184992	2.2546326457	1.39805473294	1.59262015767	1.83399532948	0.981735645671	1.62748585488	1.5222669313	1.54042140608
ENSG00000183696	8.5159600486	10.1837406245	9.08634601606	13.0171331494	20.0433486028	22.1033546556	15.3924912538	21.3070763181
ENSG00000104177	0.804956436835	0.550142772657	0.479883387161	0.652193505641	2.15479729743	1.23877058495	1.26920294841	1.33141392311
ENSG00000148339	3.7934284267	5.5950784538	2.97733535219	3.01260887909	7.93159687805	7.52158486366	5.41676065492	4.23714913493
ENSG00000117643	3.95894429374	9.98289218285	8.86262329904	9.63079821765	1.45819163488	2.44287331985	2.7149508841	2.55748787985
ENSG00000133134	0.266389889918	0.0749074084785	0.105684742786	0.673715161502	10.0857531438	2.26006850349	0.858929713138	2.14338421859
ENSG00000111371	20.9118320912	4.65986487627	5.7191566486	10.6749863281	52.2432717587	42.6952610196	28.65445877	18.4229336101
ENSG00000204389	21.2809661921	20.6784543881	15.0422994883	9.66153689388	7.98808167365	22.0748600189	10.0035093536	180.766920312
ENSG00000143507	15.7966015394	12.6147304381	6.77503939738	6.42945913149	35.9303367446	24.4815164189	18.5105878326	23.3968552504
ENSG00000197208	9.32573966732	6.46230379518	4.10560589331	2.64090566789	27.567163975	20.2852719988	10.8284846649	13.1040631029
ENSG00000172432	15.0006759885	9.29019447099	12.3497261559	18.1161858668	41.8802743764	24.8611990224	21.4739179901	19.1673427803
ENSG00000166173	9.40918261855	11.7742044393	15.1814877668	23.8771021146	22.3517234264	21.5261724255	23.2198165617	25.0046971799
ENSG00000243364	2.61632340303	2.59321081788	4.31721238082	1.97280095603	0.711470907917	1.35039851467	2.33741370119	2.39772707225
ENSG00000237172	14.3662183866	12.4854600729	13.3549438486	13.3328104703	5.83837846258	12.0237985895	10.1382405324	9.29196422384
ENSG00000126368	4.45514794534	5.20206799522	10.7911618195	5.65854951521	13.6526918408	11.966078556	8.757637537	20.7010069938
ENSG00000143479	5.63162165482	5.40094367631	7.37894178396	9.16431855613	18.3831067573	12.4848579418	10.0806564199	14.3210117211
ENSG00000113742	4.16183287109	7.10223086914	3.91090064586	3.95132324332	10.5971566124	5.44745493999	6.11425231342	5.87241129526
ENSG00000139173	2.40912442631	2.06890343556	2.01781457554	2.29038070518	0.835576561343	1.55505431219	1.51190536359	1.25988577692
ENSG00000137460	0.687787659218	0.56716687582	0.678306671386	0.680899099063	0.228215889127	0.274479137643	0.319511341356	0.31322282968
ENSG00000059728	0.818338829283	0.763856992725	1.41616200665	2.5804497773	3.83907149387	1.54336467089	2.22767507349	3.73838174071
ENSG00000145242	0.225408110795	0.345373310117	0.244505240161	0.153286482641	0.622455453833	0.937089052849	0.926651850299	0.38636624152
ENSG00000149212	2.82551388998	16.4977391737	15.9032318976	8.10475258529	0.541203967413	1.43229449355	4.42195488966	3.27933541429
ENSG00000143367	1.35215319336	1.32804339078	1.0192240385	1.18476065792	3.51990134936	3.13027190992	1.92873353673	2.07039767715
ENSG00000105778	5.31483794517	4.08589665434	3.22941177517	3.0290660995	11.6562856462	6.65265313621	6.09809114736	4.4281879082
ENSG00000152439	0.65662169899	0.728309940995	0.664201913517	1.12418446319	1.51489281452	1.32307355808	1.48588635232	1.20429951928
ENSG00000153395	6.95048835245	7.60812539619	10.5483320991	6.80584635553	3.25203938181	3.81603856894	4.8224240252	5.14047946256
ENSG00000102996	5.23218447764	1.90206355432	1.83175985158	1.92583746715	2.61144676295	2.96364100543	2.48834986124	1.67211837818
ENSG00000261824	0.884595834493	0.919073208032	1.0008665465	1.3813940088	2.17132684367	1.65099353465	1.74497790734	1.49977490388
ENSG00000188290	4.48891298201	1.19862687421	4.47908192567	1.30919696439	12.399059677	3.57603780053	5.51895237202	8.89784642523
ENSG00000102409	9.00537591805	16.0135876806	16.3554867954	21.6458049501	21.2946394071	18.429627559	17.9287349302	25.5362767459
ENSG00000197063	12.7644927793	13.3175557753	14.7595396827	12.9834833261	32.8644718632	24.1582492147	20.0265431861	15.2798585986
ENSG00000103175	0.681319169765	0.23882480678	0.578578130193	0.824238286699	0.114447030083	0.127496688065	0.962967532792	0.739034863944
ENSG00000168209	10.4315976993	22.0563941045	100.611716745	36.7736289683	30.5300091791	66.3465702626	197.532101735	245.775917165
ENSG00000232480	6.57924212658	8.03371738841	9.33597733364	1.11102562307	26.1269165686	9.08586838161	13.0790507371	11.8442301447
ENSG00000106948	2.48206268335	2.33219064842	2.85266059372	4.73314605453	6.45681289441	4.93181930551	4.21541061845	3.24368750348
ENSG00000232679	0.941290044896	3.99280502568	8.11886392937	19.338720999	4.08034584546	16.9654866899	20.2465846754	67.5541565539
ENSG00000168268	16.9596717179	18.6758095654	26.9081542148	20.9797362599	7.31947673349	10.8564261838	17.8741496318	12.0121804559
ENSG00000162433	1.74407338595	2.03373243064	10.6811179503	4.70314921841	0.28467173182	0.474020440733	4.96138940839	4.55081908443
ENSG00000198355	16.2889264711	19.3580844046	24.8084551362	13.1729792219	45.1081546323	38.5994886047	31.0431490584	32.7782234014
ENSG00000132510	2.1375610771	4.63793279314	7.65408138313	2.37982410285	6.25130861866	3.94666261272	5.40201570338	4.1415739442
ENSG00000151012	7.70882033551	3.91429154819	2.1956911029	3.86975061784	22.5660214003	18.1244731008	8.4001102058	7.14844752357
ENSG00000235863	1.15975319853	4.3167224312	4.61665313803	2.87043903373	0.263386967107	1.74811088279	2.3370435647	1.96881244483
ENSG00000246100	0.452591921183	0.409279196377	0.473626684698	0.428898416052	1.13280017634	0.848593217568	0.879852688983	0.850591550893
ENSG00000204131	0.374263514989	2.51694603206	1.75868736726	2.8008337775	0.0660233280159	0.277606351355	0.166672489716	0.0968953788446
ENSG00000120053	13.1081349103	10.7475735464	7.64885413409	21.3336632775	37.6813498002	30.3234739559	19.0771066415	15.8318211159
ENSG00000151304	3.56372024964	3.30584718205	3.12582656738	4.64721737993	8.2580356318	9.16941566219	5.30147376089	4.78417810944
ENSG00000262001	0.983536881618	1.93792307074	1.59512628047	1.77988249096	3.36523683399	2.89935690058	2.56793583281	3.98774221753
ENSG00000171132	3.55972891133	2.77994089147	2.95631978442	2.60669231054	8.0731526364	4.10285110185	3.21533308521	4.22559423999
ENSG00000260804	2.23286166879	1.98526286071	1.49502015021	1.47536690053	0.787421108105	0.817221559852	0.979878059864	0.736722817135
ENSG00000100100	5.13149903298	8.62493349971	13.1773740917	10.4804407462	0.736893415345	3.79691353287	8.0916004715	14.5848391796
ENSG00000123496	0.571002482277	1.53027774105	5.04995369017	9.91941406114	2.72478287782	20.248792474	9.41202093062	15.9919313455
ENSG00000071246	1.26145132869	1.84613805637	1.78420287783	1.78975666635	0.547185154885	0.864738145137	1.29352601871	0.912202354403
ENSG00000061918	0.878840287128	3.56575695785	2.921184504	4.37142453906	0.178316567372	0.820529868467	0.799615963671	0.598927959488
ENSG00000165312	3.08972363879	3.21143688821	5.32457953607	5.09935300192	9.17789964045	7.41385537121	7.89519442542	5.65281867934
ENSG00000240230	2.12987810631	2.3617904047	2.54225687741	2.47580783107	4.83447078117	3.90550951532	3.97743242592	2.60503161862
ENSG00000121060	19.5219798194	16.6572406505	15.4281197232	14.6996968687	45.4281939405	23.96090695	13.3028998798	10.3458920645
ENSG00000172216	106.064304219	131.246026828	167.1439485	92.3493891079	222.686006044	418.810067699	188.765945301	387.7579455
ENSG00000247095	1.49712933714	0.247069582585	6.28333694349	1.04174548247	0.206349613563	0.169740369355	5.00004525602	3.79315343746
ENSG00000178093	0.497998780033	1.32238124233	1.33932129048	1.36674583595	1.89678880314	1.71797609925	1.43456789388	0.88210646936
ENSG00000120370	3.37204021498	2.9044156908	3.97298375508	4.16775885689	7.58170406338	5.61390672367	5.81172357201	7.2225659707
ENSG00000109743	5.75433096453	6.53689548009	7.20605061282	7.18134511931	2.35729707119	2.70155860929	3.23118551431	6.79730496403
ENSG00000164176	24.9635930461	36.8105931221	38.576850556	43.4072353891	10.8034673527	17.0363136468	37.1908455455	23.7968470973
ENSG00000119986	26.1012964664	26.9530819037	34.9629888231	19.9689637607	107.09709304	62.1264861673	40.5349123008	66.6903604846
ENSG00000171067	17.1022241449	17.3300553243	23.3941239762	17.6440171182	7.69546603651	12.37880935	15.2781246676	11.4934192398
ENSG00000139514	19.5933076776	15.8671138692	11.9786121781	14.9002006104	39.3667776328	36.8207107597	21.3968238386	13.4446759232
ENSG00000146411	1.38472040454	6.36948905163	4.30632752553	2.04462465337	0.215591168452	0.404326073018	0.500223808725	0.552517589136
ENSG00000255874	0.572640082012	0.481826411742	0.233601883679	0.247335523242	0.124443815271	0.118251205233	0.0759013611519	0.0859545982127
ENSG00000065600	3.44130538687	2.61428890941	2.47861936359	3.39637900934	8.2957698726	7.62596888671	4.41215258135	4.34700103771
ENSG00000105136	0.601090424408	0.542852100593	0.767513717331	0.806516290869	1.34452879229	0.75814185384	1.24436983052	0.82844966044
ENSG00000123933	14.2492752502	23.1352296834	22.1917879116	19.1048947105	4.75108512929	8.86784982063	14.3641713411	11.6528276474
ENSG00000171051	0.686480583642	6.81032179788	1.97216273242	0.775586107621	1.99994076037	4.60031775281	2.93892234829	2.37961364471
ENSG00000160606	2.13278665525	2.24332550481	2.75255506827	5.22244769558	0.697741418707	2.64668699574	2.06422766208	2.18239684262
ENSG00000113319	3.48656355867	2.50787935354	2.40977287596	3.52277396774	11.0515437553	4.99520057093	4.89835555365	3.9063759748
ENSG00000178607	1.48321477303	3.25320484669	1.56613132285	3.07637331668	7.91661542286	4.77366862789	3.41752753106	4.53687736597
ENSG00000167987	7.0122158063	8.79765629057	8.12006435264	7.10769481706	14.2352633991	13.6147263421	11.3453807506	18.0040408626
ENSG00000120899	1.2881568796	4.25893937126	3.93221350156	2.78465919358	0.574803428446	0.660754887324	0.585076799201	0.528294046391
ENSG00000197766	4.51247667697	15.7046977544	16.2909472641	14.5522646488	1.55602820875	1.69178238747	1.90813101871	4.74324176317
ENSG00000243742	0.11213515073	0.428690715688	1.87428010579	2.41539991761	1.26968447207	3.87022692562	0.694713235941	1.25987637623
ENSG00000164244	11.7072219431	9.77856396595	9.8887614841	9.21797717817	5.62481455278	8.20310728287	7.87775271277	9.83366743518
ENSG00000141298	1.73976397199	2.90343489957	2.56115400255	1.38399806487	0.571499267954	1.34220781564	1.18325643162	1.13070834653
ENSG00000236404	0.0812345481226	0.0264000369516	0.104881609823	0.170367444489	0.484606608671	0.894287508986	0.810993004335	0.631449276855
ENSG00000107201	7.9707121085	4.93245731338	5.09451807513	6.91204239815	27.1765924164	14.172578749	4.67536130946	4.01727118881
ENSG00000138035	6.33220533104	4.36487729734	3.36644350489	4.2847819757	12.7128055119	7.8791385234	4.45279550397	3.93516808372
ENSG00000166401	4.4811502772	6.85240765542	3.28331886339	6.0140887728	9.04329942225	7.88624409374	6.28562082837	5.58827957532
ENSG00000228589	11.6889743561	4.18442395617	5.22389330414	7.75269448967	4.71307645363	4.54772137554	5.88525851877	5.44029826808
ENSG00000138028	0.478759161617	0.264124825021	0.808747085685	0.523052587788	0.112840987075	0.0378150646038	0.222939674652	0.298122337144
ENSG00000180332	0.412061195802	1.32761796333	0.885041098465	2.28398035225	1.51968409481	5.38206821348	6.44623228548	5.06974567619
ENSG00000157693	2.67022270648	2.26873874644	2.46042886381	3.79389522418	8.4830208561	5.52644160086	3.76738002561	3.577993633
ENSG00000181381	3.14656242748	2.97632498127	2.74916495362	4.1419077738	6.34737574868	4.3874296291	4.19918053404	3.22354023953
ENSG00000138646	1.40765536306	0.794679910494	0.462429853906	0.542967994277	7.29861922793	2.37201966511	0.832565021348	1.11103732271
ENSG00000213189	8.36421517529	6.79280171725	5.61094398203	13.2917897197	18.5278332644	13.5786039061	13.469043631	13.8814190933
ENSG00000164949	4.57470045319	25.434481828	13.3267874109	17.6843208786	13.4219240053	17.9157913934	10.8361824978	33.2524025668
ENSG00000197594	2.38384301872	6.60671042576	5.02997472311	6.48439415339	0.816100654345	1.79776808605	3.04390358908	2.02569341543
ENSG00000237220	0.476016261835	0.123305751435	0.221733611381	0.309708715261	3.13635861239	1.37453854137	1.02292546962	1.28831917981
ENSG00000112183	0.685931519407	0.932786259638	0.754745491274	0.615467928957	1.57027854244	1.59276717865	1.20873328507	1.01890415994
ENSG00000129474	12.7883649324	6.64653598468	6.51296826308	4.4178166099	30.5597501197	24.7957436467	14.4708286284	6.32360019353
ENSG00000073756	4.43996803889	9.42303330317	18.8929430123	3.88678923984	40.8254208784	15.6690854016	18.5286623766	46.9212977509
ENSG00000182175	0.0960284009148	0.703474778389	0.589000355175	0.346628763303	0.0144907698822	0.122255614452	0.0563527978885	0.0962437877897
ENSG00000264301	4.12968411694	2.82121374591	1.60128569329	2.52307918423	8.87350145674	8.18896886326	6.75374592798	8.12757104852
ENSG00000143498	1.9537809484	1.48642700614	1.73413544308	2.41132132226	3.95341458491	3.1765579483	2.75461445711	2.51887944165
ENSG00000197329	0.852595685655	0.982107487529	1.26067983541	1.224950027	1.74278400957	1.50727002348	1.73037387311	3.55746443291
ENSG00000163661	383.831213422	145.195440525	438.545841955	360.38197842	949.538068609	704.627399666	553.744044949	583.263961238
ENSG00000228626	5.21975857267	1.95849286792	0.716330923615	2.15299231502	36.0929426307	12.5287821278	12.7880542301	7.59496607924
ENSG00000165507	11.4909557583	7.50451841033	8.60755196931	12.0608180566	76.9731169014	32.0113927021	14.9497059724	20.5547347762
ENSG00000113621	17.6264421207	15.9446611957	17.7234917584	17.1647773582	7.27298596609	9.07920893257	12.8215849382	14.0822539803
ENSG00000144485	0.922347362449	1.12888556701	0.930539333154	1.67930092393	2.47458073291	1.4773622277	1.59126402957	1.88842851072
ENSG00000274213	0.955540349383	1.59764226999	0.784633538772	1.39845772181	4.51032863563	3.99922764312	1.73526340319	3.4802028962
ENSG00000107317	0.649787220847	0.300447329541	1.07814578145	1.34025324347	0.166542095905	0.154248223983	0.680105473403	2.27594982017
ENSG00000059573	25.9670198097	21.0536267535	25.912916978	22.5802370898	12.4462673052	16.4584183026	21.502811898	19.6567609412
ENSG00000167703	0.553099935643	0.652357920831	0.730214158104	1.59446602518	0.0901032515694	0.228393188172	0.21611288825	0.315601571015
ENSG00000127399	0.377052352584	0.387609244151	0.280202625585	0.1503513901	1.17347706859	0.668275035615	0.465637813148	0.252888399233
ENSG00000114423	1.00863670482	1.91595296369	2.49382533219	1.47695243372	2.07931936831	2.82125706532	3.28469380186	3.5463026983
ENSG00000119922	7.21891624017	2.84834944965	5.91972933807	7.27832617394	37.1293686039	34.5781408248	5.89445188791	5.13258358233
ENSG00000169252	1.11573821837	0.924536108787	0.607978115925	0.443800730376	4.610169569	3.2216935191	1.4137538143	1.08229230303
ENSG00000169750	3.21460767446	5.03938725111	8.32695111204	4.53818035934	1.38046647694	1.67154845557	5.44703217081	5.03897224758
ENSG00000105327	3.10808304412	4.26575666025	4.45177009672	9.27440429602	7.67166453657	5.37676986662	6.82623018246	6.6454256085
ENSG00000070669	0.314092606682	0.178740033041	0.101258834036	0.527485676584	1.37785008716	1.90156925135	2.2719863469	1.06355916368
ENSG00000230183	0.473276936181	0.736640608061	0.670054736742	0.822800349727	2.55148535362	3.40025101224	2.10286875207	1.62359369784
ENSG00000172716	9.01091724473	7.63980548145	7.71784774139	9.17717999325	3.5264982998	5.0428369917	4.13366505678	6.1251132109
ENSG00000168306	2.32322922493	2.83133922291	2.28300711974	2.37761965395	0.718788768885	0.811856617398	0.982047677258	0.941475928215
ENSG00000237596	0.0830331893009	0.0890502914553	0.213688443084	0.117862737846	0.472266766328	2.02690780701	0.756069627306	0.993723022538
ENSG00000185022	19.4740729412	32.5833414786	28.3709869389	22.1039758051	50.9907742693	41.9872218525	46.0207487211	68.189863016
ENSG00000010030	0.897708332988	0.52852249776	0.408966100832	1.09320462655	2.94766806541	0.445508592396	0.439011937566	0.254173599778
ENSG00000179981	2.08678212176	1.69672591523	1.47102123726	1.29897482669	0.850811970572	1.90393407143	1.07549954976	1.01181993572
ENSG00000106123	3.97363735338	17.4776791077	11.0106982038	6.88600451352	0.560428581831	1.70559963415	2.82389404401	2.02431660939
ENSG00000157168	1.25721204672	1.75150404503	0.970266555594	0.979781197089	4.40312757165	8.67932644202	4.57624559419	4.36349130664
ENSG00000141858	9.29711757782	6.73371408449	11.5244714469	6.69716086451	4.39266926239	6.92480703803	10.1802673861	6.8662593443
ENSG00000235385	0.051715749003	0.28421576482	1.85005717544	1.1479496897	1.13317467374	2.46908173116	3.11917117496	38.1238277606
ENSG00000064652	4.06907994812	3.19853999344	3.59536197049	3.32768068332	8.50989537322	3.96693411884	4.23920178325	4.39376744424
ENSG00000163633	1.9113586448	1.23704095026	1.42619611366	1.23383450427	5.86394338149	4.87294929268	3.05274993299	4.58065640053
ENSG00000261213	4.35510410371	5.91608468878	4.5304907077	3.86715437123	1.60492284805	2.71829989599	4.36748736152	2.78364267754
ENSG00000137834	1.42308006477	2.96581395078	2.11669469825	0.913510332077	0.333219396591	0.655341863119	0.599778969546	0.352769785552
ENSG00000130487	0.00464942406668	0.0039878475914	0.0134256595974	0.269968831631	0.513897554029	0.118018829045	0.0	0.0447549179206
ENSG00000134278	5.68260464561	4.98553687734	4.69009825417	7.1786987583	11.8183668753	8.07471585328	5.79733733018	7.12713315551
ENSG00000166750	25.6974240429	23.0849924779	16.2876027651	29.5555580351	57.1001125067	23.9663422113	27.8538794143	24.9036623967
ENSG00000152409	2.18169282294	2.39216959232	3.39179790446	2.40020525744	4.78243594188	3.67890837109	3.99060013419	5.27761138916
ENSG00000120889	35.8872894786	30.7765867056	26.2300378008	30.637699109	90.3186653222	49.6786677848	34.0239302691	30.7292000099
ENSG00000068079	16.7768728992	12.8612896021	9.84046228202	12.4159044363	41.4840821602	12.0649532237	7.41762782071	6.04524374934
ENSG00000185862	4.56713525667	1.98179280409	2.40679153561	1.89786784756	16.7336825075	11.7887523972	4.27611317209	5.58978610317
ENSG00000153956	10.1754381911	10.8893922732	8.94973262229	9.69249861607	4.85482545392	5.61364342321	6.69834209414	6.10573270182
ENSG00000153879	7.68342784273	5.9237796887	3.87649136282	8.63118074298	21.0758648758	18.870450189	13.756638572	10.0413889054
ENSG00000112773	5.05643628862	6.65450990452	8.27719097032	8.72625429203	12.3895500568	7.6827103203	5.67523969855	5.42620387968
ENSG00000119684	1.13940566386	1.60861060393	2.50170757574	2.01373542224	3.1926273585	2.59133173153	2.4648052985	2.25083523793
ENSG00000163840	12.6478916787	9.14574698887	7.97217727797	8.35944981933	29.7684827669	15.1814680471	6.42425626247	4.19898858511
ENSG00000058085	0.607241152743	1.58899853273	1.54098893444	2.00584685736	1.29617152506	4.28587679246	1.51628017642	1.53639218054
ENSG00000070961	22.727531885	16.1170847114	20.7294157372	17.0636028098	63.616232346	36.4048547025	31.1348287168	34.4019283403
ENSG00000135842	8.09028068568	4.47419777118	3.9920882068	13.2428409905	28.655748457	17.8876276588	8.58063009078	8.90916079302
ENSG00000138642	3.94524962276	2.15733612253	1.6772069867	1.58713400493	11.3948183695	5.58437632979	1.96700904153	1.03510085856
ENSG00000130303	3.46002306436	0.557049320208	1.54293240146	1.17833170105	13.726539892	0.758234108497	1.05087946797	1.44544522038
ENSG00000111981	1.09909055845	0.296068534037	0.409053188646	0.828255279531	5.85491854052	3.32813930522	2.06040854799	2.52211682594
ENSG00000120875	2.77359652329	4.97468792433	1.93657144322	0.579418596665	10.791652866	2.8786435584	2.58164530255	4.44209165267
ENSG00000107731	5.96588040147	7.69233979133	15.3100438488	9.28234584435	17.4784062056	7.14710055167	10.0068010348	6.42000317792
ENSG00000173166	0.949384494854	1.43662911438	0.812101610659	0.975018800401	2.3537031118	1.92559394442	1.23381083127	0.904305724581
ENSG00000139289	35.0691443178	42.4470035896	33.3862876729	34.0265155701	71.5647730759	121.045057713	57.8403564439	83.4050215317
ENSG00000198538	1.45926319925	1.53054448701	1.41499444743	1.79871831777	3.94428393571	2.10676269832	1.94408419803	1.73196829127
ENSG00000152804	5.8077903492	1.16567802904	1.16874325423	2.38058107707	12.1153224217	2.25562898152	2.43223189393	1.64614240582
ENSG00000196756	2.21719067782	2.13428532484	1.23076883641	2.26258897546	5.00667004343	4.86194537506	2.60416529647	2.3774280329
ENSG00000110400	2.00477229384	1.81837135504	2.25790779519	1.50375064918	0.774319402257	1.82473645463	1.27414430348	0.99720864467
ENSG00000166920	2.90304218055	0.597400313129	7.83758757537	2.02448032633	7.95692064417	5.09399192008	9.48571051525	15.4605108124
ENSG00000178860	25.7517401951	31.6063767685	20.3340727288	46.8429020776	82.2972373966	41.5888900184	36.5052425427	30.4445193253
ENSG00000178726	5.303304672	8.14982176394	2.45036269768	3.36198977384	0.645399786724	5.10550440257	2.49743752773	2.51695719813
ENSG00000164823	5.4943369088	6.75903047366	5.2711543705	7.4529270897	12.8293598269	13.7126074109	10.1652000036	17.0945517726
ENSG00000134684	14.617054174	7.64390731869	6.8754044618	13.6101006082	31.4608729401	26.4353977786	15.5560972504	13.6003498178
ENSG00000144597	2.40858147033	3.58578104342	4.05467295989	3.33605218264	4.87871637866	4.27082417391	4.43822324446	7.69041174666
ENSG00000133740	0.444447645199	0.419837605149	0.38080430989	0.688932252759	0.97481702018	0.922610186361	0.834511036823	0.722277390538
ENSG00000181585	0.0111790638457	0.255355013777	0.132055932989	0.352619564406	0.874254765714	0.204484940248	0.21728760732	0.212809128956
ENSG00000113361	1.38970972943	2.84162255427	1.8720952674	3.0396006678	0.238962685164	0.517778865257	0.649104706582	0.243151475778
ENSG00000111912	5.60271724771	5.32052618877	5.26588774689	8.31903227532	12.1450835605	11.3432044769	9.24287322969	8.73098292797
ENSG00000146083	2.02398792226	2.7105786034	2.83784741397	2.3931683772	4.1814619994	3.420632101	3.31534631705	3.67933939056
ENSG00000115998	1.84364625664	2.49313036582	2.19799308235	2.46925708075	3.91045317059	2.99533874717	2.17254897561	1.88333234656
ENSG00000128165	3.2514180825	0.512836687457	1.19975279721	5.23547035239	13.1334589799	11.8816566415	7.3614892009	5.63559337286
ENSG00000175040	18.6264648455	23.9567072983	15.7037883685	16.7131710279	47.210484074	65.033926857	46.5200807002	50.1691352497
ENSG00000172493	14.2292005352	10.5420002799	9.79897671858	5.5941565906	28.824969719	21.9914322819	16.8055829555	16.8029012571
ENSG00000275993	0.310135669675	0.220162531393	0.277103118508	0.247341140563	0.70820188828	0.39771477588	0.631745258213	1.46766715657
ENSG00000231528	0.416478124798	0.773650976973	0.658618418487	0.808829459349	0.158829781721	0.378573691905	0.292811581744	0.282299767645
ENSG00000123689	1.85731272471	2.80493940033	19.9296902863	62.8958366354	5.96961619404	26.7018660303	19.8699271534	159.367808993
ENSG00000196611	351.07589493	2000.73354186	4960.67644844	2431.22403894	1179.5022591	2771.99902295	3804.78680402	6329.76886813
ENSG00000149289	3.96533867662	3.58941104308	4.19139138087	4.70381473378	11.6242522024	10.861756109	7.48656887694	7.5115964631
ENSG00000132000	3.81321529501	6.15127734335	5.36490703868	5.93132571583	1.41050119118	1.69274733856	1.77475385172	1.82115428418
ENSG00000205795	0.807643114131	0.674766099014	0.720890484769	1.04377301608	0.180146760693	0.113457015517	0.487325191873	0.461930679327
ENSG00000115289	5.20212798162	6.20149797721	5.24555932825	5.8511919534	10.4952370805	6.78584386909	6.86767137627	8.31722156476
ENSG00000133773	4.0109053031	3.75433949505	2.98872365728	4.05972614359	8.45718013369	7.64331294387	5.68213757631	5.05856922717
ENSG00000136378	11.7964241573	11.2440533548	8.22347091442	6.01763219521	5.74822716241	2.50124552305	4.33368262144	3.97850721981
ENSG00000170903	5.35495501952	5.30742087652	5.35237836609	7.63180287248	12.1230629167	10.1200473379	8.1100467293	7.42905845095
ENSG00000123095	0.185227950159	0.317102650585	5.0327626553	0.487271230192	1.38669102164	1.26359315848	4.81867222917	3.42395318475
ENSG00000256128	0.49344014281	0.746604363457	1.67115768574	3.72884527458	1.83399555419	4.0312219528	3.56378097722	4.6969311412
ENSG00000128602	2.12323799775	1.56695991161	1.59819275658	1.44699559461	0.961039079599	0.722536652186	1.06222514342	0.608339549039
ENSG00000128272	127.139522909	129.092667074	123.004563503	154.516554197	263.191495152	289.647332711	259.772058335	289.541335575
ENSG00000129038	24.3959463068	74.8551014998	63.9698138547	104.217981542	9.04383109466	7.75564314044	20.2827368158	14.2693775813
ENSG00000167191	2.95114239976	5.64484393473	6.71287159273	4.36087117156	2.03447822953	0.462393870691	1.38440814523	1.90134144141
ENSG00000116183	0.0465520052103	0.0129012784348	0.112732259053	0.203694125874	0.0326210739105	3.04742751681	1.21081473235	1.05250052866
ENSG00000135069	66.5457327424	9.91078591425	20.5700876846	90.5287214904	132.250552538	214.979082161	128.087221285	77.4573529324
ENSG00000185585	1.6616587796	12.9811847312	11.6016720551	12.8737660251	0.707341111776	0.354548084366	2.17399421684	2.10612875633
ENSG00000139269	0.739893445115	0.130315753928	0.144508347202	1.03091211954	1.62149438944	5.1338681906	1.65913715655	1.83783576562
ENSG00000162337	4.81199723784	11.0828152141	8.90606905873	9.25627003826	1.89116597375	1.89285798442	3.22049418132	2.84502811003
ENSG00000130635	58.5038290519	47.4583761497	68.99827463	34.6726784175	24.2620924259	7.42957208801	20.5377885912	16.372151508
ENSG00000120594	1.14157661196	5.03526092548	3.5929357346	4.45681471525	0.389640959712	0.568204540008	1.0303794133	0.741709020463
ENSG00000116678	15.0815008327	35.4797056285	28.7326987224	30.8304875577	5.91499517813	2.58706056327	5.90627371263	8.50667345608
ENSG00000168542	306.010058289	271.464072643	198.995924907	185.07378641	120.396508498	26.8270232597	51.4842561685	46.1530633606
ENSG00000115380	11.9912585422	40.2175548584	33.9325355212	28.3480961827	3.99898194389	2.59948973986	3.6675683811	6.11746570082
ENSG00000164692	965.45811687	913.55410581	614.313740021	482.929159562	408.902714792	197.293960081	223.594812327	202.476395051
ENSG00000184005	0.054646944955	0.0231216104225	0.094810702642	0.0115403512111	0.372269260689	1.10374430637	0.903598568841	0.302253876286
ENSG00000023445	2.09547060083	1.33883071399	3.06534479348	9.87317635822	5.99631173561	9.40010035444	7.14377413945	9.91684579167
ENSG00000146250	0.464235021848	4.89646078139	6.69168010405	4.13128340008	0.232654409159	0.32247409683	1.95872771314	0.941691334435
ENSG00000122707	35.6303618355	52.960023068	58.887438592	36.1518145213	17.1455885692	13.0041527711	40.7486314197	41.3532084248
ENSG00000211448	0.169082925132	1.8278885544	1.95885813449	3.15364203165	0.149177272594	0.107875635954	0.0720615597271	0.082461199974
ENSG00000079931	13.1250237945	64.7908864736	46.1231309283	48.9235987125	10.3929905776	16.3810505648	19.9628846653	25.7045162556
ENSG00000240184	16.1333086717	34.8412745048	35.5194719299	31.6796399365	7.76575981363	5.54419985679	9.67069904314	7.72525782909
ENSG00000145244	1.58753203221	4.24562463811	6.04065292982	7.8445381524	0.573447377697	0.45387878802	1.04486369555	2.2703948827
ENSG00000092621	13.6269575318	2.60616613083	3.40540972932	9.79839985504	17.5988669309	24.4720366682	16.49396796	12.3288859394
ENSG00000105967	0.00760909178217	0.0179781863121	0.0784490051356	0.082045081742	0.0514025539076	0.397242687006	0.245256077294	0.26294496671
ENSG00000143320	72.9579561876	260.139077773	511.292917215	320.783216018	43.7846722117	30.7054017112	166.637649304	243.318605782
ENSG00000187955	1.98257209885	11.5280182347	11.9629919627	21.1651307595	0.429271650295	0.538694869826	0.701193219506	2.18382326011
ENSG00000134285	4.72558097096	4.56350304095	4.76600778072	3.94043752218	2.7983492082	1.28513199419	2.92199967287	3.15611906004
ENSG00000184347	4.96159767556	14.41226739	12.4872108351	10.0655507353	3.10922218419	1.79439052259	3.67283545911	5.06294421488
ENSG00000025039	4.07374899078	0.732005345437	7.56856462375	2.03756022493	7.73322013535	4.41194009247	7.56769357428	12.3399011182
ENSG00000044524	0.327507864829	4.08160382215	6.31088320532	4.87419064019	0.132163373948	0.155507665101	1.21969707803	0.73741610831
ENSG00000147257	1.23580834289	13.8516832913	13.2245700264	6.56207959196	0.449463428146	1.13507066652	2.01416249431	3.370432636
ENSG00000085563	0.163695275158	0.156825552572	0.249162515717	0.639835599124	0.542980939407	1.07706223757	0.786434009538	0.514936501525
ENSG00000182199	40.1198093288	17.5864821373	18.291679237	38.3665424122	85.2216225634	68.495126926	41.9335844466	41.582016368
ENSG00000132329	1.2982779927	5.40321144198	3.36414389803	20.1518767072	0.276394244006	0.406518901732	0.431702963596	0.402176215255
ENSG00000128052	1.81378433345	0.257853643482	0.492705723502	0.341214172884	3.35692070222	2.71220799163	1.13534790652	0.756310496788
ENSG00000104435	0.0631310333928	2.17176876054	14.0073861568	20.6431697788	0.0	0.172250778897	1.5855387908	7.98852154799
ENSG00000182985	2.07370793996	0.431068362498	0.768512945622	1.18560050841	4.30854889947	2.99564381147	3.63324785668	3.82135457685
ENSG00000172348	3.35570108268	6.05480831431	3.30187068358	4.45082735632	0.871527090642	0.982778024222	1.04403232869	1.14343616787
ENSG00000100196	58.5197104077	58.6199390069	71.3602566049	70.6292050031	22.3356208558	13.2633755561	43.4764216943	42.3712013877
ENSG00000010932	0.0496689176853	0.99121844465	0.240658543811	1.40385947503	0.00359069313189	0.0	0.0874241108777	0.255878007713
ENSG00000088756	0.213165591662	0.380989241571	0.548355779226	0.326628511847	0.0496601104136	0.0422062592029	0.0858396326212	0.107064173702
ENSG00000150594	1.17179647382	2.57258151734	2.18402565045	3.25419873131	0.207799318463	0.189374589909	0.156975455387	0.183129487464
ENSG00000175130	2.01209402351	2.70236491421	7.75875323283	2.28123858774	0.988522019785	0.527543129215	2.92821987167	1.99460079234
ENSG00000260230	0.0310636435924	0.318841615016	0.507171634146	0.125899917763	0.0405698703872	0.0227351509323	0.125321050234	0.106372661714
ENSG00000168952	1.60527232058	1.43893170049	2.03944374206	1.37782404078	0.744254229085	0.339599938292	0.861465549306	1.56909073055
ENSG00000166482	6.52743805494	73.3631863144	103.592207849	227.187504111	1.97066211816	4.4743495065	7.657346866	23.2402534939
ENSG00000113140	489.485071897	417.537833467	341.471320516	474.386904517	187.528504155	94.8158649521	184.465122745	188.947170787
ENSG00000169218	0.702671374389	0.886667548305	2.80580794382	2.19835649328	0.239806669282	0.0676727905618	0.195353217454	0.343411935465
ENSG00000167123	32.4429497219	37.0458755171	43.6549357595	42.8782609118	19.2109758145	12.4318363179	22.1695734181	31.9591677933
ENSG00000171791	0.771807095209	0.343212609898	0.257511123124	0.695435574026	0.849643150878	1.5141665345	0.585711316364	0.538929845805
ENSG00000095209	6.14986072487	4.12590511311	4.86051508362	6.87925890441	9.58871812349	15.4462177836	9.33770233019	10.8191417199
ENSG00000171812	2.1288060853	5.05950533832	4.8407893029	16.3886447842	2.19194569553	1.03864946818	2.18364804443	1.95857216799
ENSG00000183762	10.4532788789	25.8999140948	24.6140017088	18.345138659	5.61835782042	3.84207353839	9.92967709662	7.64847590341
ENSG00000175471	1.57064457785	0.822791006233	0.960209275832	1.61099486652	3.02239739093	4.12063831116	2.88426427663	3.97502484615
ENSG00000112139	1.27696925241	2.29257297176	2.05698094599	2.19984519219	0.852203061279	0.456264158555	0.93146114947	0.811639711832
ENSG00000148180	34.0469844124	87.5145444047	62.4633661018	70.0710718942	20.2565205627	17.4880103418	38.6701177364	32.172366317
ENSG00000182379	1.20984691182	0.540609063933	0.946941910839	1.74074461555	1.10215264912	2.27984932845	2.53357248559	1.46688822619
ENSG00000164683	0.034131609476	0.129242874988	0.0840614007134	0.166365791848	0.365675652904	1.22605879804	1.71559977632	0.856344996463
ENSG00000108821	1197.59962459	976.914911537	567.320482623	700.612639701	392.860091827	124.900487036	156.679067284	121.524601739
ENSG00000121552	2.80172838905	2.51720402668	3.6629267258	6.80523912246	4.74629712965	14.3041127995	10.8601100542	12.310267437
ENSG00000018236	0.314508585686	1.82683262175	1.72192308312	2.208235615	0.218822945836	0.285638606125	1.03240285163	1.18539033769
ENSG00000106333	91.4175795999	135.253170254	109.785270361	80.2431108301	57.9102182452	37.9554875044	51.611923018	43.4243398668
ENSG00000123500	2.42315196145	7.312290512	9.66430488424	22.0205101254	2.52580552425	1.56353549896	3.05539866276	9.22886830735
ENSG00000112320	0.471401849822	1.2329835825	1.849560107	1.32070750507	0.187959503183	0.144222903395	0.789709135539	0.822055579858
ENSG00000185565	0.149640166127	0.602892169154	0.295489804407	0.43252599018	0.041181637471	0.0607320708094	0.0929603034646	0.0261928632675
ENSG00000134802	8.04019932737	3.55421648631	6.96863892482	5.34280379421	18.9536274212	22.0297087111	10.213794881	14.970856014
ENSG00000147852	0.982033150188	0.477394692752	4.7102866451	1.27442404671	2.39661938763	3.83374597781	4.33045915421	3.5760859658
ENSG00000136542	32.5674107657	30.4748569581	27.7275354301	22.6642161653	17.0290276268	6.81450814826	20.5545601218	19.5350209536
ENSG00000187735	24.3839721909	17.8162356695	21.140667038	34.9742759461	42.2156281111	57.6867524414	37.5015151699	37.6810810639
ENSG00000139971	1.11898372628	1.68923769262	1.25952569083	1.41087466531	0.397489268373	0.291609283599	0.615252421382	0.985753839936
ENSG00000106624	87.0161063112	207.905645501	232.538521887	194.913695823	67.6427231313	48.2131816705	59.2478196417	118.591905639
ENSG00000127083	1.25410438064	7.96954291018	7.29393047735	16.9958399536	0.465191336492	0.226234083487	0.186279753904	0.525912135442
ENSG00000139567	2.41983264083	3.4527848979	3.97921469944	4.62191012714	1.55609622116	0.795304095003	1.73711634269	2.40284722723
ENSG00000163815	0.647454896313	3.21777893597	1.67603824138	1.11184415298	0.128146824819	0.0317671690764	0.317262079973	0.398786061393
ENSG00000110900	0.551810383119	4.55398999824	3.67288930155	3.30696202791	0.453931909541	0.296831442188	0.21370135657	0.415189648421
ENSG00000173376	0.309664895831	3.18777681157	21.2152273017	0.468967397967	0.101087536425	0.282769720392	9.49713843014	5.2063150995
ENSG00000142173	658.780082573	1101.92323932	1727.72895782	1306.96493368	533.950432762	414.443975888	1312.90386888	1550.54596207
ENSG00000186318	13.6684355557	18.9810690852	18.6663792768	16.5600623625	8.89565151506	6.9365404101	10.8297629627	8.45331323705
ENSG00000132932	0.0865026730476	0.101280657198	0.1002654371	0.114335904391	0.204277416636	0.458489515465	0.180616083964	0.241013282716
ENSG00000136999	18.7731386819	2.32111165672	1.87361680795	6.79915462634	21.5510888649	14.5541939618	4.91238981165	6.04927227778
ENSG00000249242	1.14933935933	4.1891644364	4.48465480772	2.65823805922	0.594792839734	0.546269213026	0.950160114262	1.21129824124
ENSG00000149577	5.32040191539	7.90842285888	8.27269042128	4.81123947843	3.04477140059	2.45699533745	4.30763313004	5.14120403076
ENSG00000173801	0.834260742167	1.21724004917	0.779057706822	0.829710174008	0.35498316343	0.0812863523285	0.0777102349637	0.484864775057
ENSG00000137070	4.60563902319	13.5207982535	10.9511236598	8.68983803304	2.39639272328	1.95760230851	3.88176010199	4.33136920437
ENSG00000100600	5.09594431949	9.7150239641	9.40769211216	8.49033656931	3.6505672037	3.55524233047	5.25125139177	7.48078701327
ENSG00000006283	0.182634950969	0.864605667877	1.20417406865	0.883927178297	0.0927060154073	0.0974874849918	0.558805950267	0.155897918435
ENSG00000168056	9.99776084062	21.9340127013	21.8041614729	15.504914379	6.83536929813	8.01477279757	11.3861556806	10.3341091009
ENSG00000163975	1.34932512208	2.36794046176	2.73415886441	0.974230607713	1.05992338925	0.3941343878	0.917263561867	0.740123882356
ENSG00000143369	46.3070326692	57.9773600621	54.1980406181	49.4198356084	43.1405298721	21.7116847391	23.9139038326	42.3969107515
ENSG00000177098	0.199669548086	0.370648069938	1.07010213354	0.391579113962	0.147582680156	0.0307121641023	0.28349880137	0.192978246168
ENSG00000229656	0.399081586938	0.581273513037	1.00453857608	1.21664116072	0.583821178262	4.24240339509	2.38480007201	4.5240231161
ENSG00000123453	0.0528160443321	0.397136247518	0.33535516726	0.340791114829	0.0354104466968	0.0593459297522	0.181010274147	0.255402304061
ENSG00000165125	0.0157582926559	0.114827780197	0.0791444188286	0.034457902936	0.00203138486521	0.000968754958139	0.00293951069211	0.00280633038785
ENSG00000153162	0.0123370646899	0.679408216247	0.463521381575	1.19975628121	0.0142803041953	0.0664615201286	0.201177112776	0.456781985017
ENSG00000113721	77.0754457141	134.964310413	95.9117707842	102.907846419	44.5140532866	42.9441487947	52.2232002755	47.6407832841
ENSG00000198478	1.23053112379	2.74997154292	1.94910184591	2.87754915597	1.04873555571	0.883006776824	1.0358420925	1.99639401535
ENSG00000274012	738.313513735	495.519909392	1173.30414202	3883.0708925	948.479806853	1193.88823	1551.83156522	5704.01942635
ENSG00000101825	26.6453734883	14.4339576699	11.7757254159	9.48717367027	16.6579690828	2.98034705774	7.39557634047	6.13555674437
ENSG00000162998	3.22159688503	29.162549643	28.7304699522	29.1892759665	2.25608521003	2.53954538687	4.01673136602	8.95281248547
ENSG00000240694	1.53252301976	2.81563113581	3.77866229651	3.60218152153	0.590121744993	0.537642162233	1.54264034104	2.21269047831
ENSG00000166986	25.2314955843	10.2815340894	9.15919022938	19.1564290375	43.5998419742	36.9807871422	20.2456402551	15.9418751656
ENSG00000138135	1.07367199237	0.467907708225	0.701423995084	6.06405490772	1.43624586336	3.24687570194	2.24526364986	2.40222307618
ENSG00000134121	0.153411957331	0.261873960451	1.61495871693	0.374387706721	0.0719332764591	0.0469619468709	0.70261264958	0.399830370612
ENSG00000253846	1.18100125077	2.81456054873	2.26688126683	1.77493513428	0.697893208318	0.982429716671	1.15471045915	0.990666348565
ENSG00000109610	5.88975915804	28.5200019588	31.7951076033	31.6574150745	3.60511237603	4.53169576076	4.64209912926	8.02149421864
ENSG00000138080	100.962977651	119.349511856	125.562658454	105.086066401	54.3092043304	40.8224312982	68.5753416575	58.7229343711
ENSG00000265778	0.668107720013	0.536371793881	0.605585470144	1.0635830272	1.64673144094	2.24487860604	1.4734509144	2.09447037392
ENSG00000235649	0.147793661194	0.414695386816	0.348932071856	0.288805140432	0.0193265736704	0.0712259061199	0.202117986528	0.15586483025
ENSG00000163993	0.131035977842	0.0553464939903	0.0717072220226	0.0889789161581	0.411956336092	1.82029800045	1.00201332032	0.514567688379
ENSG00000204262	111.952944595	94.666897324	77.5781568549	61.2814881742	72.7905688038	33.6514690679	51.9592253665	43.7601389346
ENSG00000117425	0.208614156694	0.604133803243	0.257812456019	0.194390442872	0.154117678362	0.112611782027	0.166143402784	0.130973094563
ENSG00000174004	0.817264805729	0.594798221974	0.45959770917	1.36484289376	1.60652410437	3.83427491868	0.65988249511	1.14552867103
ENSG00000163520	36.7898063784	59.9254717122	45.8849335218	45.7251067622	23.9000253798	14.0618932185	12.3105902966	14.3304736911
ENSG00000118503	17.9863733258	8.96182691772	25.0846247653	22.2666543542	27.5154415218	60.1643220575	32.6959644602	51.8709875339
ENSG00000102359	8.05586645469	15.9883232956	15.5061646749	15.0235485585	6.50334721353	4.08369489279	5.89559067488	9.09082498713
ENSG00000143127	4.54540358163	16.1050516655	9.73558137425	5.13824715344	3.1917021323	2.17143133639	1.62087696666	2.64178764802
ENSG00000172638	46.7397592336	61.0073258145	73.0451764272	71.5484502795	26.0420296197	21.0392562277	35.0378768492	57.6700826766
ENSG00000104312	9.22166950314	7.66096082057	8.2672265371	15.3623266955	14.0036204442	16.6783037151	17.4544377659	27.8454988166
ENSG00000278771	12.1541464307	9.27461219077	26.2152054215	90.7295177361	22.964398131	28.4140413338	46.3147734016	150.059557216
ENSG00000174600	0.115212425695	2.18788342933	1.14174724112	3.28418307681	0.00894783167699	0.135577837582	0.0352654718574	0.17646244626
ENSG00000123342	6.1520404163	11.3165539747	11.7701756253	6.65083677962	3.73062282699	4.33157909896	4.46626363558	7.64320443705
ENSG00000152402	1.01818346785	0.495759895332	0.372756708201	0.805263772326	2.29533444472	4.95325437715	4.08531916232	3.43436636718
ENSG00000143819	41.3445202184	67.5291478269	47.4277386145	51.1825887325	23.8956532353	20.0494895263	20.3442474279	20.1883031582
ENSG00000125637	0.856871617136	1.18421798137	0.935448726145	0.567821940628	0.516678287576	0.27604014349	0.382907114319	0.297582063544
ENSG00000236453	0.155957773835	0.466644898402	1.60322542857	0.741234006357	2.20033568091	10.9539588932	5.206190302	11.9264759115
ENSG00000065911	18.9441386013	6.85597079996	6.44740480052	17.9796935618	48.2762989659	45.3212697178	43.0600664415	33.9460097286
ENSG00000198542	24.884445994	51.9242082898	55.781385709	79.3253434226	9.7833996106	15.9557156533	19.6949941991	32.1620854163
ENSG00000109265	1.31963731995	0.44297638973	0.383084009212	1.16213348944	3.11768015927	1.61829065937	0.737776295028	1.04030851552
ENSG00000064687	0.527536472266	1.8972499913	0.569393804804	0.445782235487	0.339229673634	0.30610612912	0.397203046509	0.359536557244
ENSG00000004399	13.1725652067	22.5295435971	20.8021728708	12.6672525756	5.66074535822	6.1846233441	10.1919285241	7.11599269764
ENSG00000166311	49.2840053985	68.4988050019	77.5868675152	72.5832315458	25.5687327184	30.6587091083	38.9557383949	44.8582609887
ENSG00000170801	0.334007982762	1.80991847969	2.00894818944	0.42858575008	0.149234090692	0.327806515254	0.907378097118	1.42611520842
ENSG00000031698	53.10704804	34.3311908468	35.0949036417	69.2115651854	78.2337872644	85.2818897387	57.7516694332	66.1624629946
ENSG00000134245	0.567276076065	2.13498418987	1.45113415502	1.55029777346	0.55300426457	0.523439460037	0.614408877631	0.499721714492
ENSG00000175356	0.325975695052	0.746988289104	0.813339410362	0.63579596645	0.228230984949	0.210363190615	0.18389666159	0.40803551942
ENSG00000113407	26.7755415794	17.369371262	17.7540767454	31.0240408317	50.8047013194	54.0694254464	42.2971683236	38.0584991386
ENSG00000079263	0.0429566825336	0.00896895916301	0.0231859077608	0.0207182406074	0.0942114252298	0.410327818371	0.0690702942219	0.0594262007445
ENSG00000106819	1.70290001883	12.5942581852	21.3679349847	62.8504185038	0.865289637393	1.36385408941	3.57288589081	5.8585859208
ENSG00000171631	0.0246707603977	0.398707350238	0.271178441853	0.705404475937	0.0225832151667	0.011586623626	0.0108477962708	0.0349390149949
ENSG00000162576	116.80198984	150.015223558	131.539809526	97.7788338674	57.0512649635	56.9631383123	118.290286148	107.864176009
ENSG00000164035	0.00265237981756	0.728147464859	0.814623755423	0.404715319129	0.00493369317607	0.0131395821775	0.0311659930759	0.0231650082116
ENSG00000188921	2.91047995235	7.27078429605	4.75805841765	4.0809212832	1.91017099869	1.61997485324	2.27611939227	2.69935506916
ENSG00000196139	3.22321967934	5.70291935767	6.22769709637	8.5697192676	0.982233812917	1.33359137925	2.45381760793	2.07966263432
ENSG00000153246	2.38220217296	4.80878047501	5.37974410677	5.00941281732	1.58078840721	1.47329548913	2.96301766117	3.78266418524
ENSG00000163083	0.251916501713	19.3260792065	16.0235640948	4.58979337649	0.0945737641216	1.34858691678	2.0946311898	3.70078122074
ENSG00000149131	7.42674533321	17.5892774963	33.3445362073	14.410830703	6.57275257191	3.89464141821	12.7833263615	25.4265512713
ENSG00000161682	1.04433988294	1.84957855894	1.89383364346	1.30157345022	0.624669493618	0.308209392821	1.51824727768	0.553839737368
ENSG00000196305	38.8096839509	17.5606065956	16.7303434594	35.4860898488	63.121307069	57.485255654	33.2855909481	28.1387991248
ENSG00000011105	13.2392246237	24.5475335067	25.4468863972	20.6058585944	10.3465285264	5.992351894	15.0784100036	18.9823584652
ENSG00000077942	270.310383328	768.611507776	743.044340307	406.857149945	245.737176637	174.36145422	263.617317184	404.563706723
ENSG00000117122	21.0954456559	27.5657925474	21.5803144491	28.4739847745	19.9772923448	11.8964255949	15.558467936	15.8637191685
ENSG00000181218	4.43344189146	3.87332618304	3.47204381583	3.50525383549	12.2923695922	11.8417398129	7.89294312797	13.3589525212
ENSG00000109846	10.3455648718	17.9804244115	17.4058775452	20.0594969897	4.63563194472	7.30185634623	7.55737581367	25.3786111119
ENSG00000175274	23.2093909855	13.1491270408	14.6217450809	11.8422223483	12.7324023874	5.26882745447	8.65201648663	7.25710491411
ENSG00000111341	0.038633217989	1.60981906775	3.06896941716	3.17561175778	0.0045896673963	0.0477787267416	0.0862436885984	0.187024238225
ENSG00000143869	0.118800185767	0.216936474913	0.255530054631	0.311370238414	0.0335284673088	0.027687132715	0.139887440317	0.0787259083151
ENSG00000104213	3.00230397697	15.8040506853	11.5008895144	15.9940746276	1.26201797351	2.5548520148	4.11082406371	4.88298210913
ENSG00000113657	27.0176670319	29.3835235423	26.8043185492	35.6414412309	21.2047586311	12.7053953916	16.4045519029	16.8640013428
ENSG00000079841	0.07749950202	1.01664196905	0.868584354105	0.777799233381	0.00695725047705	0.0647033838351	0.21410385022	0.135671782351
ENSG00000174348	10.2114339503	19.7921471162	20.0611646019	30.7882088207	6.18980414274	5.51031361325	4.06263006687	10.7421704993
ENSG00000007933	1.29193931137	1.8783818345	2.47210752175	3.34777699514	0.661798014175	0.453882239204	0.821747683237	1.30068006106
ENSG00000187840	94.7731930267	30.548262105	118.408559092	75.0952702382	148.131270871	161.358330848	180.68901538	239.025020466
ENSG00000160801	0.13774093704	1.08379130652	3.52661508545	0.756469765492	0.0502580961205	0.0543152647187	0.83236966157	1.27282247805
ENSG00000141338	1.16909818637	4.31816424006	3.94420796957	2.67585826237	0.278902874001	0.466498362384	0.762324578515	1.37591644538
ENSG00000120254	8.60081492885	6.18617878314	9.35521088763	9.95996336648	13.9051414774	16.2371252003	15.8146201814	16.1390484781
ENSG00000138316	0.727266758231	2.00228328604	1.47046692775	2.63999180408	0.287917653094	0.211595585251	0.562024286017	1.09435002827
ENSG00000064205	1.59734061496	6.6015336535	7.89009587293	10.6471987192	0.751507540292	1.1464095012	2.65117825023	5.2804757363
ENSG00000111799	274.604859956	325.843786897	305.846023344	149.771716638	156.329516588	57.8541304431	130.741112522	124.887427213
ENSG00000188783	1.45643870799	5.82407514743	7.86086298203	7.28098749383	0.785924837914	0.790354199051	0.606919029173	1.13679863249
ENSG00000110811	25.7910697389	26.0626276369	30.2908036651	23.7054827789	17.0547104203	9.82045414951	18.5570112426	18.6242128164
ENSG00000238120	1.44850542261	2.35726847159	1.60181216392	1.05009019721	0.163032400845	0.19169288113	0.650667914032	0.485717427191
ENSG00000100889	11.812355599	3.53241086623	4.31742722578	13.3607636959	29.6941119404	26.5866596534	16.9937495102	16.0512007866
ENSG00000138660	7.96840447796	6.28320890405	6.79804081933	10.3155130242	15.9418155631	15.40432436	13.5895231591	12.5959191828
ENSG00000147894	0.696170617361	0.543364743244	0.559512880257	0.677069027734	1.06498575758	1.36225954711	1.00496721806	2.47643102777
ENSG00000159640	1.58893979145	2.1554367122	1.65526525936	1.77816411076	0.902377390496	0.305109596031	0.309967777994	0.577986206299
ENSG00000140105	25.431715897	8.55284932118	8.75683501022	25.4402386944	49.1844361599	34.4492443976	19.9143281189	15.6797749862
ENSG00000076344	1.32769169244	1.77636945891	1.55056350668	1.92224149917	0.695828197777	0.395055744442	0.696022936635	1.17449710626
ENSG00000083444	56.1324019969	51.8701561824	102.800424897	53.1485130804	39.553924127	21.5662765686	70.3940435602	83.5934491245
ENSG00000169862	0.0	0.156174271254	0.173580254701	0.0650915841758	0.0	0.0	0.0135151634463	0.0139854376355
ENSG00000129009	3.58046840784	6.43537084915	5.58318521518	6.82959050097	0.907851184917	1.03190997211	1.30522783568	1.48485510286
ENSG00000143476	3.74164185663	1.14795275328	1.41014779793	2.31280080767	3.5355244567	3.6313298887	2.56633487803	2.85832794055
ENSG00000088340	0.139203823419	0.298358954834	2.28155572989	0.105641255296	0.151094640787	0.0279779177917	0.724405349553	1.35681195355
ENSG00000173597	0.0827678384598	0.526577364839	0.320927142408	0.249624826066	0.0141985182498	0.011216378055	0.0139963875533	0.00879877299942
ENSG00000181195	14.4592189319	31.6535336524	21.6207742422	26.8521397757	15.5131135492	5.39435652586	5.77948304644	13.4600088295
ENSG00000065485	12.4096912181	12.6056535198	13.9892523244	10.0995933444	7.28937452884	4.42851189017	7.91401466332	9.31269071826
ENSG00000124749	0.00589421900965	0.516229754205	0.388441459083	0.299241306528	0.0201746570202	0.0493516447297	0.150856220307	0.0207960580877
ENSG00000118898	0.407542348969	2.83796691793	3.46205527261	2.0547096734	0.685862701267	0.230675617469	1.48675144502	2.96709290993
ENSG00000228221	5.33137835981	3.14334692305	5.02372783783	8.13597038203	1.29316073209	0.192650531236	1.30525193054	1.70829993154
ENSG00000173705	4.14229884547	3.05907113923	2.95506249274	2.24344787264	2.04808561346	0.972390677173	1.59971438787	1.4561427976
ENSG00000182575	0.252598246904	0.827639756101	0.897280280789	0.525726912315	0.0821373193651	0.0852644610963	0.63597697315	0.546453667674
ENSG00000145284	3.91542378651	6.67799713222	8.49230427552	4.22660140377	2.10401406587	2.55820744353	5.59912594821	6.7542076382
ENSG00000183570	1.20843411896	1.95580399483	3.44250897561	0.655256659327	0.633235692473	0.498282609533	2.05645879713	2.62798187357
ENSG00000261625	3.43563813775	7.7774824627	5.15726555704	2.07442853651	1.88574949489	1.21622161975	4.39952521042	1.16808254778
ENSG00000279117	1.07261088584	1.25030144486	1.62123910853	1.30200046468	0.436815866901	0.24356675839	0.797981959796	0.593822635741
ENSG00000089048	9.18847215988	7.37100924873	8.80239911648	10.5410496311	15.3847284468	15.7676568984	13.7704864153	14.3691586079
ENSG00000183044	0.713029697368	1.01999809615	0.488565518274	0.516189138538	0.226777999086	0.196391061748	0.398999453013	0.324658672201
ENSG00000185742	0.00929429848616	0.417228486729	0.399439065803	0.214747870066	0.00447254608464	0.0399523456216	0.0268577785796	0.00226589728823
ENSG00000136295	45.1493694728	48.7580248847	70.7810588183	33.0672401788	33.1190766619	21.1150524031	40.2005406185	20.3503704661
ENSG00000196517	6.67079579656	2.49591527615	2.01503468285	4.39014992028	15.0013240457	12.2485133344	7.7818222282	5.13925651159
ENSG00000255690	0.455192723788	2.19544966376	1.67129788931	1.85381994514	0.165646736717	0.209582101968	0.138373079639	0.320550771892
ENSG00000012124	0.0312581250077	0.0	0.00212894589077	0.013150066074	0.100097977453	0.0991610995068	0.0	0.0303932648281
ENSG00000196365	30.500350185	15.29289901	29.9461186313	25.4870115534	65.0727351223	47.7437878278	35.4211065662	32.8831458611
ENSG00000120693	0.973477643131	1.85149844616	2.78336661347	0.653195317572	0.512984949617	0.514320245624	1.81304788579	1.53397343618
ENSG00000166033	186.540670433	413.400130203	498.332900975	549.517345503	134.485236745	167.688022804	254.191602565	273.552043021
ENSG00000122694	6.16656011682	16.0409946297	15.6949392426	21.100111497	7.59971321522	7.58146131559	8.37329301491	6.9543173949
ENSG00000168032	0.53986684629	1.11967043233	0.99639197245	2.17440477744	0.226314278088	0.21243012615	0.638210875142	0.800298079036
ENSG00000213015	9.6247647753	8.1583231733	6.8348685288	6.44401308516	8.84623278557	3.78701027725	7.30296802047	6.71244791551
ENSG00000158292	2.52550763336	5.84825676408	6.35034357049	5.43706994294	1.45518005977	1.17295302824	3.53881940277	1.59550752554
ENSG00000115318	41.4482149025	50.5082583211	80.0974411349	38.6775837214	23.1300045518	12.4773611297	37.0416292159	44.0639033336
ENSG00000142156	687.065935964	1018.36452888	1282.24834106	1059.32110472	449.478131244	330.861717835	750.418417633	882.184106401
ENSG00000166035	0.134162407921	0.396892458898	0.35573090779	0.272152919531	0.0519623052678	0.0769294495724	0.0637793985495	0.0620209175685
ENSG00000133026	6.49225174218	10.1689463638	12.7415328788	6.79853630871	3.93445571714	3.91172766653	8.45325442706	7.42559964926
ENSG00000185015	0.531952598004	0.317276235742	0.334952419951	0.286960040092	0.743690271987	1.12451470375	0.481939610687	0.436573749465
ENSG00000110881	0.937321709921	1.382807	1.38548699825	0.800624805779	0.379571694458	0.453700928378	0.848609341723	0.826558789665
ENSG00000185432	18.3984193881	50.9472249412	40.3472480261	29.4351328259	8.09548768222	8.14020748106	14.80665248	24.5792964562
ENSG00000162595	0.321798946092	6.7535257498	5.04888829665	11.2963288195	0.319134999598	1.21426033825	1.45543332245	4.72434112427
ENSG00000163751	0.0280663214186	0.0	0.057705530818	0.018383319005	0.114937657972	0.422147676864	0.0612760649241	0.00905451565886
ENSG00000119681	68.3230456991	146.982773358	110.979023497	111.382007906	39.7549722393	46.9257408218	52.8012186862	68.5068682917
ENSG00000145934	0.545562624594	1.36285885584	0.687967872302	0.864761571319	0.233663261671	0.412206276667	0.513005227687	0.324343797087
ENSG00000171246	28.0460670597	0.435348401028	0.291012900931	1.05002139064	6.15974483689	1.32056094262	1.59583571515	1.45653351873
ENSG00000188641	5.66750488753	12.7560053832	8.8101626742	9.11420376744	2.82981813924	4.36457100994	5.24736795225	5.45334205639
ENSG00000148218	10.6945555977	20.6075754239	20.9690779906	22.3666290543	7.47471094293	8.4667994225	16.728140055	16.8213499725
ENSG00000154721	2.67283225052	9.45063809725	24.3094355013	5.07100051391	1.34168406501	1.02729922549	9.87495637105	9.76874521194
ENSG00000167552	127.813824595	105.664548175	92.8512299242	143.537282003	31.3424262342	21.5812157033	65.721608963	36.4411687498
ENSG00000038427	13.8709052903	25.5203961061	23.5103423224	22.2262016915	5.46149737096	6.28403234592	10.8834431664	6.1513269045
ENSG00000175175	0.104836109046	0.0703833074307	0.0638275193402	0.109436734397	0.472955235458	0.46610831525	0.171753758239	0.126150109635
ENSG00000163710	0.0	0.669373642806	1.67470748949	1.72139838289	0.0183688247645	0.0332966082187	0.13294599868	0.119469439281
ENSG00000116962	44.3317703235	52.9781692572	41.4782039488	22.4777506234	28.4416521093	18.0466663157	19.6458854907	16.4407539783
ENSG00000160223	0.0264047519829	0.251522421014	0.368953898467	0.92363381147	0.00990095030895	0.00717995719909	0.0615075830656	0.0506648781934
ENSG00000134042	0.0375678372341	0.610553928587	0.547280629558	0.186961740802	0.0111099014835	0.0272156170061	0.0180472364614	0.0169404631743
ENSG00000168938	13.5372460016	15.5499747336	14.5991157718	17.0760000628	8.02404746983	6.43320407443	8.04451745564	7.30752513311
ENSG00000258311	0.224753487927	0.735256895906	0.581542001558	0.430765754142	0.149314701956	0.168165498804	0.327725356884	0.373610864574
ENSG00000124766	4.21281156074	12.3496613397	8.8927612747	6.5948902352	1.97629165793	2.95234204832	5.72069557562	3.55649380738
ENSG00000101166	17.0258924518	12.8570254639	14.1368174201	18.0791073193	23.628775146	27.1008480271	22.8527922537	22.2814627836
ENSG00000110203	0.37494453406	0.124677288278	0.551820690959	1.28082970206	0.652954364579	1.18658501182	0.886772252362	1.32128223193
ENSG00000154736	0.91880781493	0.540710127637	0.352381231261	1.56133504172	8.0070017408	6.4421851496	2.2608193558	2.26436955083
ENSG00000054356	0.307221909242	0.124597330958	0.691853859257	0.107630366342	0.223095197635	0.58043863003	1.67390025152	0.795741924639
ENSG00000088882	0.155466880129	0.816065830504	0.496750575678	0.0976679813863	0.219975737063	0.00954513334143	0.0193966053391	0.105746804875
ENSG00000137857	0.184136709379	0.445755305005	0.359128967491	0.330297325403	0.182825132356	0.144247571362	0.19316465809	0.219392537516
ENSG00000176046	34.7182117198	23.4778949165	28.0144286826	49.2345412952	52.1809821082	62.8880486162	49.6062046882	64.4041089375
ENSG00000161381	0.0405443954733	0.202335390225	0.143519120483	0.484835544209	0.017592813429	0.00745642139579	0.01522663978	0.0208018026112
ENSG00000273179	8.94777300383	25.3299733027	30.584533016	16.7906237236	3.01767580468	9.04719777945	16.5052305364	44.9421236811
ENSG00000179855	0.108160137598	0.407721781184	0.719736290037	0.0300233854566	0.172000797412	0.0184915433218	0.450569327312	0.491753984024
ENSG00000153029	4.64718106006	6.61321199576	6.47976806203	6.19188858258	3.02089502457	3.0781373593	3.97388352469	3.00525447421
ENSG00000000971	10.0185173833	27.1162510417	37.2092523416	30.4589272908	10.2419806937	11.7997259746	19.2600784832	24.2918824171
ENSG00000113448	1.54055365655	0.881286559067	3.30353109581	1.02196188352	2.61830791818	2.97831101825	2.30994446555	1.96088698254
ENSG00000178718	10.6160927839	4.61413373558	6.26483237141	6.21602872049	16.593228481	10.5015800108	7.81235907147	5.87828560572
ENSG00000170962	8.49196902838	27.6453091934	18.9123358846	10.9368519185	4.06799605816	4.13844138542	8.16940742777	6.70792846106
ENSG00000178573	1.02730896878	4.78882653892	4.22087409076	1.7563072421	0.567359783205	1.19505563583	1.36675970323	0.964970572414
ENSG00000179222	42.4403039772	32.3771632673	31.7967480433	27.6815613125	15.2335784462	12.0907130807	24.8787763866	20.4330876416
ENSG00000006747	0.317102701959	0.508088212211	0.499771500625	1.07561214575	0.112966546419	1.92331839825	1.77936596236	2.04630147019
ENSG00000132561	0.319157944949	1.8319657048	0.814145925114	1.04950854762	0.118051289902	0.179629517192	0.254730812286	0.174522350958
ENSG00000172260	4.54631590842	2.82897735516	2.49013568282	3.94547988396	2.66258144681	0.980113935881	1.75244168623	1.49100612387
ENSG00000113645	1.96354499689	1.19211472475	1.08998795079	1.02531004425	4.02376448888	4.11638847562	3.20136896806	2.43990739883
ENSG00000022267	21.4579521798	27.2139317765	31.3602043737	24.0090128272	15.2677975511	11.5097280892	20.7277066286	23.1394275344
ENSG00000152127	32.3633482406	47.4080831677	32.3392861712	20.4989762092	16.2685902588	11.3217074739	20.5540129797	10.9237563439
ENSG00000168298	0.438657798269	0.125595247479	0.146719721512	0.189406971715	0.439262472207	4.05239623366	0.356851152485	5.5645243283
ENSG00000115902	3.40539316165	2.47313457977	1.9845155603	5.75593914265	4.96902591604	9.6858723521	5.21968449276	4.44206541022
ENSG00000139618	0.784170209062	0.436168079338	0.437887747556	0.468745553383	0.924433842137	1.38418341031	0.840724352766	0.712655374109
ENSG00000185201	75.2492115961	100.549564371	69.4350726149	47.3738480855	52.3096780023	33.9122987378	40.250527131	31.8690899489
ENSG00000203446	0.0157046046115	0.182835066213	0.272799872708	1.3143182661	0.485185661881	0.898611662862	0.424888202008	1.04519610741
ENSG00000150687	21.2754957941	30.7511672653	27.9248659568	36.7572465956	10.3136756614	12.3635191089	17.2182086451	15.6983568024
ENSG00000171208	1.88988605101	0.45290298337	0.352274548427	0.549070085176	1.76550254223	2.2620317343	1.48934600565	1.32585405394
ENSG00000165891	3.12926667025	0.821095509139	2.19100518169	2.08674424953	6.16346887348	2.24837875079	2.70341724684	3.27298596232
ENSG00000092096	3.74286281969	6.50281321298	9.8005257598	4.56523965771	2.40077895143	2.28780715293	5.3075202748	5.2254772779
ENSG00000197989	2.33116776004	1.6436138322	1.99431202063	1.98309822747	2.63196427675	5.48503765339	4.20439264097	7.16920632729
ENSG00000198910	1.55289295214	0.00882710014689	1.13820206456	0.0676035128359	2.00822068112	0.154838060445	0.605671985142	1.53680687689
ENSG00000105290	1.29429601525	1.26171202737	2.30099161129	0.90269866158	1.06020711622	0.457518548236	1.54343633942	1.12651471286
ENSG00000125384	7.45045719162	16.4128881916	15.5593271352	12.2407024518	2.20712161457	4.14717572854	7.33908953709	4.43509964756
ENSG00000132256	6.14571373359	7.42598481945	5.81487451143	4.76744779264	7.50060974785	3.43450942325	4.42919882835	4.21220894869
ENSG00000143382	2.30304869812	7.67223631687	7.08229793168	5.21022349984	1.79160264444	1.61822637513	1.86807914581	2.8839485032
ENSG00000099864	0.0431889460342	0.423733540217	0.612192563433	1.06470094351	0.0130243500775	0.0611633474647	0.479702803021	0.495314589565
ENSG00000127419	4.85363472388	4.98673169368	3.72240473454	4.27945474239	3.10779175967	2.36175749272	2.84238373202	2.56270510813
ENSG00000152931	0.00988586284279	0.0	0.00172537140402	0.00467219405779	0.0542179353604	0.048888173316	0.0368368651547	0.0157636001027
ENSG00000154864	1.22128956826	1.8220346605	0.748238280182	0.725714936623	0.581606627796	0.644352212646	0.495013831149	0.362726888353
ENSG00000167617	44.4343172022	68.1553945309	71.6031145264	67.9646798066	35.0545788096	26.7667465841	65.4719190398	77.8921225945
ENSG00000155367	0.114720581515	0.647171156154	0.602481666095	0.4448356481	0.162899319534	0.129025309991	1.19937108192	1.06965908411
ENSG00000131737	0.495870406859	1.46882492996	1.54447417322	2.38340805092	1.63570703615	13.0934532182	2.46980926243	2.52732738803
ENSG00000159784	0.57794899391	1.19345533605	0.992608924921	0.985553261175	0.275404872947	0.327199287432	0.432963829496	0.363780956804
ENSG00000109738	3.94728249613	3.08673235754	3.64678626781	6.59912984874	5.50353893083	6.78216741946	6.31315066571	6.61854665665
ENSG00000169248	0.146706251544	0.00965653081516	0.0932546948363	0.26297723375	0.76766420239	0.395396644545	0.19605398424	0.0385026775718
ENSG00000162551	0.802402095631	12.5539453785	7.59617412542	16.0442702086	0.176551797051	1.08296803744	0.665699753649	2.93736787669
ENSG00000065717	0.599406593097	1.37723931877	1.58643956438	1.29079176901	0.618070637767	0.322552764181	0.610812486037	0.696361437085
ENSG00000153485	3.96162923556	3.37434300281	3.26791235334	4.76452800931	7.51789012898	7.96327433219	4.89948126168	4.54815136763
ENSG00000197632	6.37611723072	10.1460762961	2.48618024397	2.73836048122	19.0598156161	65.94769824	33.3754956309	41.071535633
ENSG00000168309	0.822203156838	11.0510471966	7.02939936784	1.85489458986	0.192422419312	0.212770844971	0.117984853542	0.198769869507
ENSG00000159763	0.980771487951	68.5317401118	105.387948347	121.034730284	0.0870310465676	3.47285199628	2.33373517467	23.5893918557
ENSG00000173432	76.9029635335	312.061827963	59.1855558089	16.1203331975	122.291751725	119.82243514	216.21014827	343.553511429
ENSG00000124212	1.92887539803	33.8835419263	41.6083127099	45.0927058357	0.432472923981	3.43565581545	5.5615933141	4.80083026061
ENSG00000103710	0.409754384014	3.36042386593	4.59286555652	3.28159613047	0.118546706344	0.248625412332	0.24634160229	0.707074356482
ENSG00000189058	11.6422890709	60.1791827685	104.126718095	126.540077626	7.52276030553	15.382210765	23.5108373324	50.1963837812
ENSG00000104332	22.5981739035	65.5341047048	96.976094567	68.7489777321	9.7221935232	11.5752520727	17.8458322678	20.8213921454
ENSG00000182752	13.6837166566	18.1312439034	8.14213027588	10.2342835991	30.5890083224	28.5223268304	28.0184033006	21.0531850324
ENSG00000141682	19.1612356099	9.13422359608	5.3715455073	18.2652947802	67.9686532427	24.563575408	23.9754282418	22.6821117484
ENSG00000132386	53.5292890218	171.638452629	213.744862158	224.504966773	33.2217269816	46.4633089854	49.419525899	94.322498901
ENSG00000101347	29.0032366451	95.9179638314	67.2748089411	29.2847692434	43.2758918747	19.9613435141	14.0382842096	10.4652934154
ENSG00000128342	5.25833122608	86.8349837845	6.59098522048	12.2397603079	21.2834414697	57.521323751	20.8285677873	59.0041496266
ENSG00000108950	0.118441268978	8.65298301649	6.11580718394	7.13995650869	0.0493317350588	1.41402734269	0.586273834988	2.76614092337
ENSG00000135424	0.314573281099	3.50654048088	2.82038834204	6.15434026113	0.270583908553	0.722656164092	0.856335106986	0.86932802106
ENSG00000164761	342.011104257	161.982155487	76.4207477696	205.488679208	305.115790571	102.909400784	264.161384655	254.49462698
ENSG00000173114	7.94361432545	20.8342624275	12.6615345825	7.41673873686	13.0787736226	16.8726404467	23.8620173473	41.1567603524
ENSG00000003137	2.60524903233	13.7099945747	5.5308858917	3.66515832099	2.66761860748	0.506681495398	0.688939524244	0.447396728043
ENSG00000250722	0.652566860602	3.75869563566	4.75173390817	5.17703338637	0.364301672506	0.756915523374	1.04286658099	1.24355353874
ENSG00000243244	3.66393142411	10.3863062769	9.8464835931	6.41888132862	2.23386476399	2.89379539508	5.3311067776	6.00417144648
ENSG00000133169	130.268275598	68.3312131437	48.5647126637	24.9235751779	282.225631977	245.702697538	309.818746691	300.768518502
ENSG00000183801	3.92462631666	6.09087647754	7.4418379833	8.6329160165	1.4748026992	2.34085709001	3.21458240723	1.9434937693
ENSG00000162745	12.9327572685	25.2829719064	21.0509477135	17.6792343578	7.6327177574	5.70114310943	6.99690234018	7.61031309256
ENSG00000174804	2.66108578293	7.1032646878	9.54143887402	7.3707955451	2.87410960813	4.12883884336	5.11308558774	4.95957114936
ENSG00000151692	4.25265779378	7.50021467911	9.00987628093	4.26639220383	2.43747257623	2.68636570166	4.26500772746	4.14075110972
ENSG00000159167	53.4719563561	338.786704231	433.403176653	7.04588611081	75.4758918199	45.0116029089	399.159480319	808.568113336
ENSG00000180914	3.46904395395	6.64253568523	4.76161740101	6.64029821678	2.06205101399	1.5787208561	0.77962637218	0.702227649228
ENSG00000162105	0.387552416756	0.650660980682	0.56619215142	0.462326255886	0.175142813424	0.167704037616	0.135818031733	0.186934628843
ENSG00000008441	25.5864384714	33.6221489443	32.4498275881	28.7087356815	13.6594925812	14.540086074	15.5798838869	13.3791060439
ENSG00000119508	7.61210952171	37.2749209522	32.9567800136	3.63161449234	9.85287740826	12.0917866856	33.4271520492	37.9300234336
ENSG00000143196	3.9211824594	10.5693949858	15.4402149476	33.8457993941	2.76644681759	2.37658520042	1.82947734685	3.92974796803
ENSG00000205221	2.15125621495	8.05470352431	6.12796225301	4.27043712585	0.517703395492	1.14366535062	0.888413279988	1.04281644137
ENSG00000127954	0.110641539101	0.973706358537	0.686811880423	0.73771845447	0.012286591486	0.137162501643	0.0878301290058	0.181842085908
ENSG00000011347	0.12385574628	1.73460834711	5.3920452153	2.65092432897	0.402040345978	0.599631157242	0.95826065044	1.12149772577
ENSG00000115009	0.51192988405	2.48155686794	2.39966801781	8.03408814717	2.05247110586	13.8652754006	6.87980074975	30.1669741616
ENSG00000165424	25.9241994129	43.0622970652	45.6768098478	33.6856310693	11.5530122724	14.0578684878	21.7274762794	14.976961145
ENSG00000108551	2.19212443201	10.5213117634	17.0398920942	16.2707915026	3.53850419581	5.12702640963	4.04692108501	26.7390193309
ENSG00000262655	9.77444025211	110.939346322	101.53305334	53.3039583214	5.94800905073	15.6534311221	10.8028834015	21.8710083459
ENSG00000169429	183.29375978	201.403914947	653.744919195	425.050033423	739.48532143	817.379268054	1436.00477672	5165.32313648
ENSG00000111077	9.54500545137	9.64164369793	8.70750660977	5.82713274687	3.5611467996	3.25960066563	3.9533790135	3.73518156869
ENSG00000163734	15.8847695037	14.4170368524	6.632522573	15.9146737157	58.1985453991	26.3357426665	45.5656817078	47.6322903296
ENSG00000134954	19.9785453044	22.3376137008	29.5159436384	10.4889043816	33.3522767314	36.8237882645	33.2602356858	22.4416534145
ENSG00000090776	9.84296173938	12.9187211431	13.1742379066	24.6035280742	4.34997757317	4.21029148184	5.15781399858	8.35973165742
ENSG00000113532	0.0744464338623	1.38321707039	1.77649882335	0.864054249326	0.0819962663149	0.341137280738	0.444121972868	0.792521309016
ENSG00000170577	4.73217836212	14.6439948649	20.1623537461	8.40672144824	2.36630705777	4.07031129656	3.5530991966	3.55165938981
ENSG00000060982	7.96845049101	7.49405542051	7.98360252223	8.83310096104	13.7336847351	16.583595282	16.9099093868	13.8746072405
ENSG00000140945	14.5564300898	7.47669352769	6.38828806412	5.28132162149	20.8286527198	21.3882430715	22.6816068977	22.153612776
ENSG00000073849	0.512021989544	1.18308549768	1.14302684317	1.33658392069	0.25885075301	0.514935087098	0.378707686125	0.551037048455
ENSG00000101188	0.472722568886	0.783695124292	0.790429602946	1.36715899311	0.0	0.0324853582126	0.0357654657485	0.0847388644112
ENSG00000070214	10.7095295902	28.1771648565	28.5504528614	18.3797285038	6.77217168733	9.74044310915	14.3891538051	12.9639827253
ENSG00000169297	2.29082700402	3.26829665469	4.85977532709	10.0039563368	3.79513576366	2.27298680596	1.62112225709	3.85673825363
ENSG00000137831	3.65812691554	6.53066667385	8.51181329597	15.0578407491	1.80005049039	2.31776333704	4.88355500232	5.66300149707
ENSG00000163431	2.55541489694	13.8971387719	9.39899307258	11.9013026859	0.900968128432	4.00861040681	4.0988527055	3.5108689513
ENSG00000185561	1.49324071506	3.24952343574	3.427194081	3.80179566078	1.00452258056	1.18372251547	1.23235554476	1.29306825343
ENSG00000126016	2.17756548759	3.71063570199	3.16263144925	1.88527210748	1.5107215321	1.72654732768	1.56633177971	1.23031256537
ENSG00000157557	16.6707458237	42.726867208	30.2122246895	5.43845581529	29.2442364649	30.0070316238	25.8880586214	28.2565829321
ENSG00000154451	1.42827481462	1.2582283874	1.53357511121	1.49975912581	4.81221199292	4.51891223195	3.03155921422	2.41797316618
ENSG00000106823	0.72043211776	2.51956391161	3.35923715327	4.01011296595	0.456807177393	1.692853545	1.02465686937	1.56822515004
ENSG00000113460	5.56599609192	3.74033414075	3.02862939292	3.79825534153	7.48942771111	10.3867617852	7.93184012022	5.1960584724
ENSG00000106034	11.8521547677	9.84043090202	11.901126095	10.9040960626	15.3148173364	21.0091116196	24.9518810378	25.0485471223
ENSG00000120885	1.73823955554	4.02027674986	4.91524420095	4.90849786541	0.952528543133	1.21952999762	1.25311175295	1.21912787887
ENSG00000172935	34.1170350158	62.0716271706	46.8145278651	34.0123848906	19.896316092	27.2843103561	22.2902358018	17.9994662425
ENSG00000149380	1.73639987859	7.13022240877	16.5638479846	12.9752136511	1.38169788257	2.58371950395	6.9591808974	8.37532295945
ENSG00000126778	10.4367065757	19.533671055	15.2688602877	11.9340862191	6.49995186916	8.96275398107	10.364182864	6.20989039147
ENSG00000170293	1.0656072432	6.44659270931	3.63244449811	2.71269297908	0.487876854811	0.987293904673	1.11897562803	1.19800839942
ENSG00000145390	17.5032067848	13.1120520717	10.6612566742	13.7486671457	17.5398254007	19.2288874888	25.9214280119	19.8116522329
ENSG00000133083	0.28213674277	1.00692749649	0.846176599979	1.31263318664	0.147546221847	1.05932668303	0.381453317408	0.302584279089
ENSG00000171408	2.10983937338	9.79971126111	8.17127470687	5.77561602654	1.32872468129	2.61605949523	3.19066734092	3.1647312989
ENSG00000122121	0.170799459737	1.631242947	1.58487036218	0.992982889745	0.0392403362452	0.234455238384	0.189197672007	0.380097787624
ENSG00000176641	2.42493636171	2.11658502666	2.39237811731	2.66575579061	2.6477221345	3.12504443097	6.21027599028	6.4277127783
ENSG00000128274	9.52023412181	18.0660986966	14.4146608505	12.1869093017	6.38255027538	8.78421016646	6.10238432667	5.90124840876
ENSG00000163132	55.1714157042	116.909342185	92.5247783364	81.967647043	30.5217389545	47.046941847	51.6368448894	37.6104581361
ENSG00000163131	5.46912762851	3.6620142582	8.1210005751	5.96192050497	13.5373452508	15.9445588929	12.2573171033	15.3106040485
ENSG00000182836	0.0126880019844	0.378215527565	0.416492005619	0.895513205524	0.0145834272123	0.0357466043812	0.0315290958673	0.0716809179431
ENSG00000144857	3.19014307915	5.87315628747	6.1966290701	6.55298787711	1.83287039125	1.92474735576	2.37792502707	2.28334217519
ENSG00000172349	0.205978944031	0.961539273496	1.09372989929	1.05990670055	0.0728167093398	0.18667518368	0.174526333894	0.247315376893
ENSG00000255717	5.56765864219	3.73633539566	2.48369203856	5.59435805284	9.32066428687	8.34383164704	7.65868303966	8.85815184322
ENSG00000258498	0.504717805787	1.46991428789	1.06320469541	1.19473172749	0.23567285753	0.289750580232	0.293483786325	0.774558567453
ENSG00000196562	1.58043084105	2.05618130385	2.97564265611	4.92663847704	1.14641570165	0.739387393663	0.688433280751	0.603200348374
ENSG00000159403	97.6888994685	175.442386511	198.184877636	87.5164784386	85.6698520752	59.6791009257	78.8707629666	122.030414965
ENSG00000118971	0.0565857538344	0.0748134855311	0.32041774176	1.64702331854	0.107835877427	0.860240725227	2.44015071606	5.02699903851
ENSG00000198963	1.29801791769	3.97848939482	2.55941702924	0.657616774776	0.510777674959	0.791212118194	1.18791851762	0.677094493735
ENSG00000164776	0.259638547909	1.97990206349	1.59483303189	0.848054516396	0.275533897987	0.344588995239	0.27260627999	1.10589651028
ENSG00000144802	16.2020296731	6.51554623671	6.16764783239	11.1545394977	34.8279534372	12.4726319853	13.7696252911	12.7094634856
ENSG00000081041	15.4246698843	8.89490009155	2.52221566352	16.8849488637	57.3353042744	32.1757992947	42.154261041	35.8993900898
ENSG00000109686	17.9362855463	39.3308251113	30.8815290915	24.5015449026	9.5543519755	13.0977249057	11.985314228	13.9809939023
ENSG00000148926	213.120819388	148.998187256	265.466411967	72.481458369	271.938733487	176.620039437	259.097222676	506.421721215
ENSG00000198814	6.06382726423	13.7417643127	6.82278279657	3.26692891597	11.8931855967	15.8385466359	16.3178408411	16.4114620645
ENSG00000138386	7.213968825	8.43351770328	7.33600467696	6.49400602121	9.46810340209	14.0890507362	13.0525041585	12.9656615786
ENSG00000081087	20.6930772961	14.3342300648	22.4414128451	19.1585043449	31.293004882	25.2313718145	29.362473948	30.8411939098
ENSG00000101439	74.2088120019	139.833855219	170.726225479	160.014431264	55.427154297	81.3593854039	80.0650759271	95.2186651758
ENSG00000171617	8.50704312866	11.5367026079	5.7225295876	9.79023687984	9.10888538282	24.1371700534	13.8731519948	13.8003168016
ENSG00000057657	2.76044945631	3.49828243197	3.25414298828	1.72636210874	5.8444029878	4.0639683388	4.09551033004	6.83743291029
ENSG00000182511	1.22312537024	2.49971706176	2.66582600398	2.27659229947	0.476694813441	1.06622055899	0.905309713149	0.943087675458
ENSG00000105329	31.3181572872	41.9207291545	54.5309477641	43.6013029887	19.7037398761	20.9251987099	42.8463642645	39.8090794909
ENSG00000141469	0.395453561696	7.84863823338	9.0058448065	12.408410063	0.0869584875159	0.628945016047	1.35593926047	1.19296150545
ENSG00000271447	0.126479348413	1.16576793869	0.795826216228	0.607395624291	0.09215947021	0.0930643855602	0.0460448152857	0.114265920502
ENSG00000130702	1.08809445517	1.64401422361	1.14675953056	1.29008923319	0.559695795359	0.391126348196	0.282513074394	0.345674194174
ENSG00000241644	5.19694393732	9.7099074726	4.81818410583	4.99860496705	3.75462325092	0.751392862406	0.695110721526	1.91203447496
ENSG00000143013	8.34557535331	10.5214325266	8.39475062235	12.0739352481	15.1388408111	22.3337243683	19.8888113496	18.5444639382
ENSG00000113013	70.4316638272	40.9065727509	35.3678125661	74.7032599011	134.300616342	110.368956188	66.1528325962	83.4393298398
ENSG00000276527	7.51750328801	10.0239120763	8.77073913659	4.87118853725	13.6717115654	8.83217732672	29.7750190931	26.8797266524
ENSG00000182580	1.216799564	2.83324876037	3.07902296022	1.88315062883	0.545040563897	1.08716040252	0.823720587795	0.660839082671
ENSG00000233117	0.800282103252	2.22113453525	2.92713107128	1.55023391897	0.486917958197	1.2901281322	1.03106814785	0.737700699978
ENSG00000163874	9.86931681661	16.9457798201	10.0967485618	12.2894382537	11.5519174717	19.2827496407	11.0889219727	20.3319799861
ENSG00000157680	1.4102618335	1.33654869109	0.933738477018	1.93429317015	4.15123525944	4.30793158141	3.09036678358	2.65673325742
ENSG00000127324	0.0165618428544	0.437831971865	0.887723381977	1.08870203185	0.00513444885315	0.0230513424434	0.0218324181395	0.0560241084502
ENSG00000119900	14.5756453031	13.1500353029	10.1040804131	8.44002354518	20.405499889	16.3735805587	23.2135839604	20.3528441197
ENSG00000064692	0.720068647437	1.42488132282	1.73960336439	0.932182139121	0.264830919554	0.420045194008	0.489289356746	0.759898382525
ENSG00000115457	170.27114349	700.474035495	777.712359671	535.095411076	76.9152919174	144.92061327	185.809434221	362.277997133
ENSG00000074181	0.719043670564	3.88735248506	13.2732524614	2.90416845378	0.530556208534	0.843929206978	7.50814186566	2.13926384961
ENSG00000152518	61.8873258074	83.9135246307	50.2125996584	51.7417229413	42.3954775397	51.7363467587	33.318638819	24.6011875095
ENSG00000182326	107.558188896	235.050037285	300.024814175	173.779398856	104.864184881	115.933423323	129.537700707	197.145203534
ENSG00000275832	17.1617706181	20.3350352905	18.6336038649	18.1431776897	13.4036088564	17.5363623822	10.5550323579	7.40058563231
ENSG00000205978	2.91158950869	5.21817080741	5.37973583317	3.58170579997	1.18065980278	2.78345857312	2.45239318914	1.80627898275
ENSG00000131389	17.1127639969	23.5240619537	56.3427484266	12.8109986975	17.6020046521	9.79094947028	32.847877696	32.3602501799
ENSG00000161638	58.6690330875	65.738132842	94.8119373157	65.0628068397	46.6400943034	58.1046426764	48.8282831177	36.9845353627
ENSG00000088899	4.57913834867	3.87437699039	3.27798523864	2.00452192937	9.27051067578	8.02027848748	7.46525111568	5.3663285649
ENSG00000161714	7.38221403098	8.95979245696	7.78447387167	8.19158504576	6.34391226214	4.41089667636	5.58979501275	3.41776774857
ENSG00000197457	2.7337413434	2.36526036473	1.96614477213	2.80207758226	1.00773422235	0.554923220454	0.529164703552	0.669373541531
ENSG00000014914	2.08112575628	3.7434377596	4.07213940782	3.32806741767	1.04967707104	1.49608951803	2.0009520803	4.21455577764
ENSG00000179604	10.5962070835	11.7384865481	13.2701231167	11.5236691827	7.35654383139	11.7172062224	7.36273613866	5.16715050928
ENSG00000163359	260.694033631	321.716521997	346.884775665	206.592042614	219.37903889	134.165947705	169.408546396	143.19970313
ENSG00000197406	0.631508256548	6.7424281753	2.35832869633	4.50837859529	0.332276679347	0.623728783886	0.745396973257	0.630815269549
ENSG00000067182	42.6209780945	46.8640995288	39.0977905483	33.83947049	29.6214070457	31.7684888038	21.1897779227	20.0954855256
ENSG00000128284	1.99328091172	1.6064315957	1.71847431648	2.74697080433	1.81391165279	1.04821135865	0.64139413458	0.825856743392
ENSG00000197971	0.155660781531	0.147955075771	0.157430105496	0.241007794819	0.147539761281	0.0233096027129	0.014894480562	0.0224393154131
ENSG00000237515	1.07989186161	0.479951292152	0.209017352866	0.0257596710322	2.95515424289	0.636179265789	0.279801941736	0.328794958363
ENSG00000267279	2.37821568068	1.59727538748	1.01842807979	1.07596219555	3.36748504234	3.8953367206	5.14939744003	4.90658366075
ENSG00000124104	7.17533621706	12.1544002207	11.769460909	12.8449331757	4.44458743292	7.97221595992	6.63419182084	7.06362699462
ENSG00000198732	1.27958336215	14.0281189682	8.60392236373	8.24842854503	2.6176641983	5.71214824432	5.60401646439	4.9852028234
ENSG00000119139	15.4236659407	14.0556580497	10.6825668963	9.04647432439	9.65074315982	5.43108525508	3.84071900031	3.72831627504
ENSG00000168079	0.030721556282	1.15722465237	0.851552302999	0.858993158516	0.0373558429283	0.0805097400974	0.0621592950346	0.144298061535
ENSG00000168646	0.377318678251	1.16673610955	1.15460861149	0.966662986417	0.231830888036	0.538449563361	0.44457580451	0.591844440083
ENSG00000170373	0.0	0.919608545701	2.74392208841	4.45187841579	0.0	0.274811175577	0.0	0.0917376581006
ENSG00000107796	15.6359994421	29.5946518878	41.7914633259	88.8124440077	10.6068374378	15.8441327507	23.4937799531	11.7929620202
ENSG00000135373	0.0562160200495	0.156960977938	0.299324099087	0.57336688888	0.280987149226	2.0184924437	1.24141823415	2.61711807418
ENSG00000119698	2.50447688555	2.5757055722	3.93264085793	4.59193170223	3.83496898008	6.6441465302	8.0376516087	8.29746355649
ENSG00000118596	3.31525023804	2.40693476046	1.8092223633	1.62648148491	3.24965824848	4.00195977042	3.50414484543	2.92741739816
ENSG00000107821	1.87141199034	3.51404997434	3.23087819844	3.76364835807	0.919328313574	1.19556337367	1.84811954513	1.37077560941
ENSG00000134986	1.48672272408	3.13214126156	3.80250130525	4.20782717638	0.987736333725	1.2658550213	1.57870793498	1.16907552867
ENSG00000198959	4.43770926034	4.95674035423	5.24952666272	3.71532461496	3.86301955569	3.91252983808	9.98883883665	6.49679536482
ENSG00000113504	6.17242992594	1.81642728941	2.74853170081	3.71395182641	11.0898610425	1.23973582902	1.47581220529	1.54938352826
ENSG00000035862	167.571569804	312.314857859	329.539362489	296.911131732	129.801879659	172.14606189	192.544865853	204.255792997
ENSG00000126950	0.575336973692	2.54308040836	1.85919593632	2.24619089795	0.226324810288	0.326430436492	0.483014396371	0.621382910799
ENSG00000072952	1.75738750163	1.93617401986	1.87680012842	2.99173242214	0.653152354006	0.332050516123	0.456315281611	0.410494119306
ENSG00000169071	1.89264753708	1.83992764675	2.95835614846	1.49560442475	1.28538384723	1.70610514975	0.728643481217	0.991236468959
ENSG00000096060	12.7450266285	25.2217967745	18.82522776	9.31579154846	6.44413384573	11.7900340304	7.3067377167	6.40427376929
ENSG00000099953	0.560987563629	2.17784255633	1.4586185552	2.15759376998	0.247097566204	0.42424278888	0.457673385116	0.347683008826
ENSG00000133657	32.4825191919	27.564308979	23.4517675926	21.6670965142	46.3514973606	42.0677661944	34.9063571431	41.8202194647
ENSG00000123700	1.96508705962	0.738119848869	0.982742897606	1.31609949461	5.63727740422	3.31618576099	3.5090572827	2.44913798888
ENSG00000100979	11.1356680388	22.2187363954	30.5695014641	29.3943698136	10.7578097009	13.0956291128	16.3573087651	28.4343658439
ENSG00000182871	17.7447991893	24.9519552092	31.542759535	28.3237342719	12.2485904579	8.55224265135	15.1514751866	19.5594320361
ENSG00000116191	11.8176823433	9.38627497584	5.51227066557	4.1073993386	12.0344566093	10.0012282037	9.93183971432	8.51409705678
ENSG00000219607	0.753178750017	1.66269645328	3.97682383376	1.8480813118	0.201147604786	0.575717201508	1.79804751529	0.54280319294
ENSG00000115919	6.40725299171	5.32998876459	4.54624061322	5.79132936377	11.0506289499	10.302038169	11.2738910618	11.2050036689
ENSG00000180346	3.8159716418	2.67652717845	2.07530844464	2.08697400061	6.45103434362	7.48400647822	4.47518521173	3.39362380923
ENSG00000158321	1.244585284	3.56080649479	2.66811869443	1.71019903328	0.708672026497	1.0837595379	0.793123394854	1.1024819264
ENSG00000099998	0.385378213183	1.94147106566	1.82182870068	1.08571065644	0.224551082404	0.855584041819	0.504880604974	0.757537094067
ENSG00000187837	25.5185625182	31.2034077659	45.1530746598	43.4567243676	39.4547533593	211.465386425	121.03356187	218.856012798
ENSG00000152503	0.19505595935	0.326172059364	0.281221333964	0.14992099354	0.446249055165	0.527436471524	0.670114497466	0.786352131456
ENSG00000117461	1.03845303928	2.6332468114	2.18233079924	3.45221209604	0.615977764898	0.810975384641	0.670526924427	0.948971397709
ENSG00000090376	9.48782244419	4.64482690487	10.9289138449	4.87265434576	11.5242352263	10.8469700859	16.3264772428	17.7091207765
ENSG00000130787	2.74060144851	6.43799854705	4.58830123711	3.51230153432	2.70448121886	2.79156798879	2.53164724832	2.59406632656
ENSG00000277586	0.149247103374	0.244506362819	2.78368219371	0.510585245988	0.183689571517	0.595612183423	5.27400921875	7.75231313079
ENSG00000101230	4.04853567452	28.1371675265	20.7833262639	13.9317724148	2.4519171492	8.78648609004	8.48960956377	9.88613223398
ENSG00000128482	0.637304907445	2.35426529022	2.14211361696	3.20324206532	0.200441817645	0.601260300704	0.571039805773	0.760780395276
ENSG00000186815	17.4294654716	19.9807316986	15.9264530482	13.5333354643	25.740843767	29.6157864751	25.1013158491	30.6844327972
ENSG00000076641	5.03868605816	7.33768466843	9.72213014297	3.24494686793	8.31491319907	10.3968954239	8.71424463365	11.6144084854
ENSG00000082497	0.911780816242	1.660037345	0.826916369654	0.846608144929	0.92750979116	0.515608589765	0.149635885442	0.265445038147
ENSG00000163735	28.28164403	26.128837358	109.517869241	9.79343541339	54.2771082197	119.305522005	172.778242627	218.073554374
ENSG00000012171	1.53697192526	2.97498828101	1.77346873019	1.42129725322	0.428308743719	0.868385184432	0.765881553003	0.983904712628
ENSG00000185924	0.12014212797	1.21655024147	0.965869537893	0.289681565231	0.0140450102737	0.0349508122325	0.0312381153047	0.0176532782221
ENSG00000187091	6.20174587306	9.42889822464	10.8156586522	10.1550923109	4.00561079779	3.83057282391	8.74486877203	8.96599917711
ENSG00000006118	11.5858186739	6.71086726587	18.6451697946	2.6518687561	23.8642625061	9.69116442012	20.9823661961	17.8612206597
ENSG00000164056	2.95050720027	5.83582996921	9.10134127735	5.49143108304	2.33582179934	2.05639520783	3.12517975708	4.67069481128
ENSG00000175866	1.18161850936	2.45112362678	1.92850280217	2.3356869368	1.18250639567	1.3193929038	1.0467409878	1.46006619759
ENSG00000080573	2.11225444372	4.51984479648	2.80457498733	4.28221574125	1.10033521323	2.30500012742	0.715576207859	1.02762160181
ENSG00000162849	0.461639013593	1.26864265881	1.3538221803	1.36836672369	0.548585528389	0.474638701997	0.361434925363	0.256398896389
ENSG00000277117	0.0450088134452	0.354278158879	0.515357674833	1.01878439508	0.0116920279485	0.017164378437	0.0138150978153	0.0705506422842
ENSG00000171604	6.56868742034	12.5527213836	17.1926668323	18.8026437297	2.05445310369	6.00239164804	7.27284993789	7.63264731438
ENSG00000104722	0.374482723811	0.829800529492	4.79059545327	0.79426735119	0.691663898669	3.59768337083	9.67320580045	13.2245335714
ENSG00000179630	7.17529044526	11.8399211454	9.02292452073	11.8211634804	12.6910853553	15.2035391302	19.9112368564	18.1583586916
ENSG00000171992	4.32589328037	4.84148303122	7.00360553324	2.95897543235	2.25740252502	2.39273852107	4.88398792303	2.28147989401
ENSG00000068366	25.651701801	89.0242484548	35.2488585773	38.0911386312	34.7802097636	45.3195281951	58.9269109945	108.103135385
ENSG00000151929	27.8309857895	26.9688136948	27.1405372275	22.1568133309	16.0775508972	27.6844252658	14.975433344	19.8284527198
ENSG00000157542	0.25213015132	0.0520837921922	0.125240970893	0.267867080865	0.0634381027664	0.0137067636426	0.013503584557	0.0442442268852
ENSG00000118292	2.8590940938	8.42836825141	9.18553989429	12.7727945663	1.76052150373	3.66057189097	4.62106476779	7.28887386351
ENSG00000133466	1.94666840355	2.49827794192	2.36547159497	1.99565474889	0.675982144149	0.761173302085	0.871172375584	0.968863778174
ENSG00000265972	12.05886554	74.2956137725	92.230473359	73.7204261016	9.55266654295	58.6634585776	33.5309954658	42.3413031148
ENSG00000166900	6.52472860842	5.69755704508	5.14119884312	4.54490062287	14.1884355508	10.284581269	8.20696851211	7.04601529954
ENSG00000161642	3.33275029727	6.53283588274	13.4487183345	5.36463118555	3.38938847004	2.25878868172	7.13585608258	6.34195513154
ENSG00000187210	8.80463045601	13.9873845539	12.439054146	7.0214943031	6.20087462697	6.19483302111	4.78707447206	4.32833429515
ENSG00000134294	211.09598749	123.290624434	135.230615937	101.112324544	294.692569642	169.28889284	241.904475536	155.897551686
ENSG00000181804	2.49323880049	6.19973878658	4.6286485306	3.78399270843	1.34574468933	1.94918718737	1.88544382901	2.32863589585
ENSG00000272150	0.29160610043	0.908282485089	0.992335753449	0.832068858254	0.237497637209	0.336522729692	0.280997115423	0.222421859392
ENSG00000120896	16.7650719884	22.7915115521	22.4073933589	16.3604512868	10.3291342584	11.9966198488	14.197254873	19.2227052339
ENSG00000085662	126.708844593	230.072455657	96.6745205672	62.5078261696	323.32170639	191.236278797	189.495987091	179.936164269
ENSG00000181649	65.3098345346	66.4310923883	45.1341733112	77.6946701801	77.2238887746	114.375884014	104.597681341	102.65548914
ENSG00000166106	0.103004152369	1.14169797002	0.453973872762	0.24578141547	0.0153933069445	0.0849998653353	0.0362364081565	0.0473083651802
ENSG00000176463	3.28322131256	6.33531774013	3.83135221831	4.10546289046	1.95260607156	3.16528393523	2.15873022002	2.14965920255
ENSG00000168502	5.65543069234	6.25123510595	7.91807218471	5.34348261046	3.15943538074	5.07636939755	4.23259961574	3.18248341629
ENSG00000049540	14.0920394907	8.3650462636	4.25393465328	8.09581194781	5.83583637828	1.94167224344	1.17796585288	0.335780154132
ENSG00000109321	0.716417282003	1.96533450997	1.59902582075	2.72130249941	4.13263312008	2.94520618022	4.77476378223	7.79124266749
ENSG00000164574	7.87438338096	10.0986763296	6.73425662733	6.91975312959	4.70584950349	5.55983150402	3.35318687142	1.98765009086
ENSG00000137962	2.07189218905	3.65447334024	4.57021064521	7.02541651871	1.70468028665	2.2745620925	2.49015269963	3.57119628964
ENSG00000023839	0.149535813251	0.636833227624	0.470252008043	0.161204733564	0.0964774640552	0.506964532414	0.0600492240026	0.0952017005193
ENSG00000049192	1.14425182287	2.20875362826	1.51197920643	0.955941741822	2.66154564347	7.14937368218	2.29671937043	3.15412190119
ENSG00000111052	1.53964894661	3.13944067653	3.10847232808	2.4455275616	1.01392811983	1.38317231243	1.56145996465	1.06985729326
ENSG00000187134	8.97042032755	33.7139186522	13.2050033034	9.68616241083	6.37980793202	12.1162151183	8.35718918304	9.15018888165
ENSG00000140044	12.4983847285	11.0855433395	15.0073470873	14.646551994	17.2771968134	18.1532510439	28.3470887213	22.6338847119
ENSG00000089472	4.13733302042	11.0996598523	12.7166793836	7.38267199275	2.40814721952	3.78119279063	5.53639687642	7.18721825493
ENSG00000152049	4.53352523116	2.8935439485	13.9500348762	3.61721736846	11.0583665804	6.20524800217	14.1845657354	17.9199823503
ENSG00000109790	14.6862400116	9.9745264081	11.2133327662	12.3234661351	15.2652900104	17.2729405319	24.3237598094	23.6859555502
ENSG00000165072	4.44490371405	5.98209608533	3.33523372771	2.73051246032	9.95841870415	3.2896284872	1.19636888109	1.99589012087
ENSG00000166562	4.60605535672	2.93119168144	3.19164703605	4.51372560387	4.91293137525	5.56382759893	6.70115172303	6.46252147988
ENSG00000260727	1.14519475397	0.994891873318	0.372050446047	1.12090777853	2.52110760635	8.3886554158	3.66386592951	1.88724352661
ENSG00000169851	0.313473427498	0.905294037922	0.745757411579	2.13580073884	0.178221180772	0.463820087394	0.312024861099	0.327602598115
ENSG00000102466	0.302807886911	0.49911493226	0.534398910704	0.837984368534	0.0828982868269	0.184515631362	0.206961102983	0.230207584414
ENSG00000138944	9.64257888996	13.9329630261	11.3580897034	11.3597205045	5.12010067961	5.09252943262	6.35290474993	3.10876566982
ENSG00000113739	271.818130337	92.835437522	241.531186103	54.1216456661	530.968000865	203.297729613	275.231784212	249.144185914
ENSG00000158406	1.03517029101	1.55179814509	2.7402841241	4.25278834327	5.02287591754	10.160806139	7.69997866943	6.17733505772
ENSG00000105894	30.3675882414	29.1079421018	27.9772930604	27.618211857	23.1416750503	12.4557777523	23.5039288253	31.4042996677
ENSG00000029534	1.66645105112	1.02240392345	0.765028574654	1.19511911744	0.587574719337	0.391184739785	0.181149809175	0.283749579752
ENSG00000115556	0.997316258403	1.99534859579	1.76512981451	1.39140144301	0.839503818422	0.805707037508	0.561964959099	0.898262258721
ENSG00000150764	2.74880933777	5.15110421477	6.44922062738	5.45699508998	1.69067081025	3.04992972889	3.36227841073	3.85231620354
ENSG00000162383	0.264389815751	0.549876279909	0.478545488794	0.547648916117	0.203606743282	0.254910310308	0.0807764736987	0.184556083761
ENSG00000101224	42.4596042065	31.8338996852	28.8505572519	26.5722037328	34.5864580243	26.2454314457	16.4695490434	15.2097121659
ENSG00000173546	22.401072434	20.3452385647	22.3531183134	18.2820847433	16.5421652563	14.1992667808	13.9537143187	9.04958836188
ENSG00000124882	1.55619185633	1.99367456707	1.09064815881	2.2877709832	5.22326342376	2.63143808183	2.58000150694	3.69097629918
ENSG00000228649	2.34518959935	2.81863861195	3.13889630985	1.33515880326	4.35753445827	3.12065426426	4.45539165964	6.73713716502
ENSG00000133106	9.9595248154	3.60743661974	2.93959069876	3.86749388495	23.0071358854	8.84175493244	6.21038583734	4.23698880242
ENSG00000137103	0.867610083684	1.39423687511	1.27565703798	1.22699627818	0.711660375989	0.639516254461	0.747319619402	0.748998706048
ENSG00000144730	0.516139321915	1.16052167915	0.88836104795	0.773582829245	0.299853224522	0.266469717363	0.545519327213	0.54496243271
ENSG00000267534	6.41843545624	10.5668995499	12.4916015444	10.2349693436	3.34444037539	6.20972431396	6.79132671343	5.14409298098
ENSG00000109220	17.3677061345	17.644045703	21.7157311918	18.9193072032	36.4378786441	26.3971715739	33.2951327404	44.0626768233
ENSG00000111275	2.01279575801	1.29381902398	1.21972385461	1.09899929491	1.84565702875	3.96106361536	3.76201136117	3.16103969282
ENSG00000185339	3.5663560339	5.10341499385	4.99195595133	5.59639624968	2.1892291845	2.0304378816	1.87252625261	3.22984310374
ENSG00000254254	1.60666989861	1.31335645829	0.979085755041	0.863522932035	1.55581011006	1.10543880984	2.52477541907	1.27088381954
ENSG00000204388	11.0470622997	10.3075590443	9.64409151231	5.53059448759	5.05147476796	12.1478289304	4.6642645007	184.117149778
ENSG00000170271	1.27287935391	4.204035832	3.53332847384	1.67317295377	1.09599736909	1.41323785442	1.96804878318	3.44403085816
ENSG00000143067	2.62737986091	3.38952562289	2.25674433964	2.59860377592	5.16198719667	5.76796576231	3.57471834232	3.43765694169
ENSG00000112763	13.1531218179	9.80072976286	19.7462953127	9.82699174013	15.9487677475	22.0074273909	20.4070693183	26.3752627795
ENSG00000116667	6.42534684793	8.01261033079	7.61510748467	4.45534784992	3.11469036572	2.53268970978	4.98728290885	6.80307696146
ENSG00000115461	22.2362595067	286.579335461	806.906201412	36.6448614718	7.94342961944	3.52920964538	67.2765795451	37.5508955451
ENSG00000092068	5.47312467486	13.9797252062	9.91693091353	14.9806104389	6.00956001178	7.95510879145	5.49645054719	7.80857506902
ENSG00000153982	0.316392004174	0.408242018128	0.249950310923	0.513931086616	0.754182441759	1.92095006358	1.2073286413	0.841201863873
ENSG00000064886	0.035446903459	0.844739561195	2.11005076496	1.97956314652	0.0389133404927	0.381938283867	0.304209371743	0.551082399029
ENSG00000166923	192.475162061	132.751496165	150.938901969	93.5572126318	168.166125259	89.5453504888	185.885753243	97.6923945111
ENSG00000102445	0.0341366593231	0.682369572633	0.360166635699	0.576730063205	0.0510548422494	0.293971800242	0.0377994526744	0.0697713783096
ENSG00000103034	0.405335912971	1.44404444961	1.21525707663	0.434491136909	0.106957432565	0.312851409557	0.511631832657	0.594390660437
ENSG00000271614	0.68022297839	0.896749052667	0.637620210993	0.88536596152	1.52796024489	2.2605547981	1.62237057359	1.61045439669
ENSG00000257219	3.17102087616	1.55517614121	0.798248234824	1.82902809113	6.23223092647	4.0763840845	2.95777119427	3.25809593244
ENSG00000127955	10.328149208	11.0274605278	12.5890961963	8.49639727994	18.2524500382	19.3339210728	18.7884101979	23.3925825599
ENSG00000079308	5.42515199469	10.8926403334	11.3568121974	10.6021820764	2.79285431147	6.56636502445	6.18768016745	6.1776387825
ENSG00000165434	2.18109808558	3.54460571317	4.66417806892	4.72372658692	1.3937358336	1.40313263608	3.09897607988	3.46532262327
ENSG00000138759	6.131174164	8.20426031793	7.65018347271	3.85668015806	5.23169711095	4.10012404657	3.68408026049	2.85908092749
ENSG00000136274	1.19034062852	1.11615414442	1.58053587446	0.719788052076	0.424103002502	0.308218408695	0.520216530189	0.36805909161
ENSG00000179869	0.177446752919	2.01302673558	3.99365915299	0.846279305597	0.197891569576	0.76722089646	4.31889071313	7.29879237312
ENSG00000166123	3.92044322625	2.21812879108	9.11134725501	4.36670138918	9.65684724768	8.54007115792	12.3681611915	7.46904568404
ENSG00000198846	4.10784012861	6.07873821681	4.52346059913	2.96667287547	2.26182695315	1.57949443495	1.22942809405	0.954976965015
ENSG00000100906	28.3797445808	26.3935416709	40.8330174507	34.5368506122	30.3765367846	53.8850930145	43.1867871176	69.3516665366
ENSG00000226137	3.7310704438	6.6283967857	7.25133493721	5.43774588276	2.25406420135	3.32971577553	4.69735952418	3.00279467971
ENSG00000148344	22.3248108253	36.6074859231	44.7818117697	39.6363049481	38.2438454337	139.49798663	74.9634672393	99.1681169631
ENSG00000105559	11.2597343206	16.3856933675	20.9890901003	22.3846841215	13.5076822141	9.5003715951	13.351056881	13.4903807314
ENSG00000228203	0.673425088824	1.0375657561	1.28303738934	0.728867844664	0.401197942993	0.465630613538	0.456323689319	0.705839179607
ENSG00000011566	9.79670801727	6.16062610747	6.84360804708	6.5175102346	16.3377274916	10.5319810937	13.0655824679	12.9037377834
ENSG00000163739	346.901397862	590.634349806	190.837199348	315.182651818	780.259202578	555.658312468	1235.2996619	907.313138988
ENSG00000106799	15.1145144028	22.4421500403	15.376707872	12.1726836643	20.471749561	21.066647308	18.3971344786	14.9555019897
ENSG00000106809	0.0267945474648	0.553958773572	0.470551064065	1.24463803085	0.0119540035119	0.056073121417	0.0220878576935	0.129284694331
ENSG00000222041	11.0226636361	10.8642677477	7.3166146425	7.32252067522	15.1713185593	13.7242473906	12.9339019129	20.0252335361
ENSG00000235770	0.215603694176	0.801459831206	1.06477591611	0.954920749345	0.163103856833	0.275034193582	0.327799658716	0.424134066434
ENSG00000171522	1.70451994726	4.77627767841	3.08697247505	3.18048788643	0.978894043802	1.41675872251	1.08989719875	1.34317378584
ENSG00000071967	65.4304035871	141.396394988	140.763202992	132.759992727	45.0193303948	69.4824153263	85.64818995	124.347007436
ENSG00000204219	2.58220906819	6.08700276762	11.1620863141	5.90935206569	1.26549853838	3.91388342823	10.6257755785	13.2819382287
ENSG00000126705	4.16048561129	4.02286916902	4.74779915494	4.29094846491	2.58603615507	3.48866846608	2.59193918313	2.63490401623
ENSG00000136859	13.1237070168	25.2101501478	21.1695761666	23.5066499708	9.74129452844	10.9382645548	11.7119676335	10.5102633547
ENSG00000113758	21.2535829861	25.8162157606	27.6501768608	27.9008590223	12.7568489537	16.2310878708	22.6933494069	19.7608815615
ENSG00000148154	44.1189420558	15.5576807134	19.1640441076	17.3433655479	69.7968254011	40.9132285327	40.9329132861	63.0534950743
ENSG00000139926	59.1138781725	40.0825504773	23.8299059082	29.4121172394	57.3617299397	68.901116185	52.909692296	45.5432512361
ENSG00000019995	5.80502177007	4.85191605824	5.38556282629	2.99207873494	11.0734851511	11.8724509406	9.63063450367	6.22193059762
ENSG00000277053	3.4111540935	2.91176577438	3.13203854565	2.03225944576	2.02430458843	1.74675460993	1.68565721639	2.7093829034
ENSG00000105939	8.79137856778	7.56596786744	6.49352511673	5.05482849053	11.2200995638	7.33303479204	3.39561086762	3.2559452547
ENSG00000141449	0.709293910443	0.511408775193	0.466607392221	0.318494823334	0.861491918359	0.245879409483	0.16245817279	0.209367656658
ENSG00000115226	7.76393682148	17.6684563762	20.6171858137	23.0345732276	7.28143351158	10.7841537835	16.5685256059	16.8870949913
ENSG00000177191	0.679568885653	0.918791046427	1.13454175204	1.18624661674	0.269374421555	0.509984822833	0.206355962268	0.211118453654
ENSG00000088280	5.14117909795	10.561901555	10.723494957	10.35449116	3.56806706159	6.63455633188	6.10216843148	7.41408683244
ENSG00000106780	4.43372798784	6.8829338401	6.80731459868	5.9080464927	3.12581059434	4.43907955941	4.55600896602	4.79708361206
ENSG00000130147	32.7487289032	30.9241560506	21.9936844255	12.4858386161	48.9610269108	52.3704846317	30.5955187866	22.1703349466
ENSG00000075651	0.665766467785	1.13238366463	1.22293382185	0.871540033312	1.16940217746	1.95098414788	2.09486494977	3.6670593896
ENSG00000143554	1.38103311967	3.14544004774	4.89032589283	1.53638687173	0.992079798482	0.913454432742	2.72997399074	1.89932431311
ENSG00000171724	0.819133624682	0.601115755194	1.9134321178	0.441927339368	0.254867925512	0.049967691244	1.98411353239	1.56337785388
ENSG00000011523	1.53335346737	2.84228464027	2.43689806293	2.30138535433	1.30508501092	1.53201679781	1.24503427269	1.788833556
ENSG00000087266	1.10213585862	1.20167523439	1.40518035462	1.13974569624	1.04587575387	0.675776160866	0.802852540446	0.796893537183
ENSG00000151726	22.5712238599	24.5206218433	11.8778696413	10.5649876276	28.67777668	23.6685246679	23.31710136	23.3196544552
ENSG00000177707	29.6089077913	11.6492691005	11.4845127353	7.38792613993	35.8233758257	20.8491811459	20.6443448155	15.3740461905
ENSG00000185499	0.49609527791	0.939924768341	2.85071360758	0.557623407429	0.375833361577	0.310107581345	0.819386741238	0.844229068295
ENSG00000028277	4.84730562712	3.82674141697	5.12990815121	7.28028205689	10.0855993755	8.97395497112	9.24189555872	12.1596231511
ENSG00000106571	4.31412757928	6.00439892339	4.9369599648	3.86191993839	3.60376656561	3.34479415493	3.23688118346	2.3129206755
ENSG00000124216	2.46399964597	8.47729425804	2.87927355421	2.28765801931	1.38622631509	1.65185945293	1.09589286162	2.45802606019
ENSG00000251022	2.43165255187	1.56225448507	2.01411554785	2.36084636563	3.52411407884	4.45769170782	3.84359865043	5.13669038059
ENSG00000204851	0.186755869011	0.496970270828	0.472548925102	0.458418036204	0.0650820758461	0.111326560835	0.0815773377347	0.127708580188
ENSG00000235217	0.942800705019	1.28834347205	1.62838751048	1.55084266874	0.639043876955	0.968695318211	0.765754024304	0.765307206388
ENSG00000259863	9.24843352501	11.7479763476	6.05993914323	8.84295220335	11.1212838754	10.7213234281	11.9183177719	11.3258624709
ENSG00000197714	0.801342017651	0.778173094255	0.623876198027	1.17452388512	1.59933377222	1.7666098526	1.40950621852	1.71224543528
ENSG00000134339	0.153116889321	4.53377373859	0.421556169231	0.164423721294	0.514081325353	0.362418231493	0.658264368994	1.78090830471
ENSG00000178235	0.0333908770246	0.134796958862	0.177568723317	0.0973633960083	0.0	0.00885088062651	0.0	0.0
ENSG00000173276	3.0418568111	6.47117506517	3.6439402044	2.69527345592	5.69441150551	6.57460487381	4.23698882638	3.9410365741
ENSG00000137507	0.5042635065	8.58613777722	8.30896898583	8.93855548111	0.28671370805	2.33906226478	4.09615168151	4.01827014048
ENSG00000116729	35.6692648205	59.9541284858	76.0517680424	45.5509620025	37.2622114423	75.0736894519	100.183393904	100.531112805
ENSG00000184575	32.4601430326	19.2149554339	21.3668546349	35.7417094652	45.868308498	51.6266230594	43.4333016726	41.2661438212
ENSG00000107960	7.79148356625	17.3450476641	14.8637796309	17.9663397617	7.08535475925	9.86489569586	9.51086295308	13.056593795
ENSG00000017427	0.0	0.0967055202269	0.239360470679	0.110470604467	0.0	0.00571406102427	0.00473600969415	0.00329727702336
ENSG00000223749	1.53224922437	8.08315435444	0.781531980441	1.54102213902	3.45215874265	1.52893572531	1.9407536765	1.66406208277
ENSG00000196411	11.9961537769	12.5024619212	12.6607207965	10.0511343577	6.8263194633	6.93194270222	8.80762285817	5.66647797377
ENSG00000106105	65.3455662472	35.3838153908	38.9391782922	63.5023342223	113.018962473	77.4782614118	67.7000138818	74.2011544952
ENSG00000103888	181.319683892	566.671426027	317.198465777	78.9826463577	106.001726227	50.8548573243	87.6133683248	89.2605636834
ENSG00000198945	2.10751325532	2.99699847205	2.99868709333	2.37421840212	1.16899566212	2.502894881	1.86864804444	2.32117147921
ENSG00000185338	4.81695215225	9.59175564005	11.1570163879	6.37852524157	3.62111762927	4.500016577	4.2334451466	4.60364220153
ENSG00000107611	0.37625370708	0.799682770752	0.803075288652	0.988982367241	0.238546837573	1.07144211145	0.34452284662	0.484083987979
ENSG00000169992	13.3089368977	17.8432753751	24.1916752097	13.9801358171	10.6285226237	9.03419618502	14.3780036985	10.3539567169
ENSG00000105245	6.88127466465	8.28969602321	9.47949708579	6.52407464062	3.526922309	4.37459116824	6.0234754615	4.58501128453
ENSG00000183779	5.69545447392	5.99481619614	6.08373777937	4.97536449006	4.28356279876	11.4984462295	4.98446060505	3.09790173606
ENSG00000117394	16.717638942	8.04959720444	52.7715886065	6.04893149913	16.4363941129	16.7054997493	41.8676598249	52.0327819678
ENSG00000153721	0.802265401257	1.06843813102	0.762936641839	0.712543855854	0.480153411532	0.690874494134	0.37711817344	0.389687893834
ENSG00000103319	2.72806527359	4.81516625985	4.17949663997	3.23460704844	1.26593475776	2.17940316552	2.47953803281	2.10615399684
ENSG00000106976	1.49586006625	3.13507679522	3.34975186715	2.49269515248	1.32859088843	0.936611506012	1.85230589188	1.82279302111
ENSG00000138185	3.63811008471	6.40742885195	9.44771463212	8.94977783903	2.02250939764	2.3632810482	3.38332879959	6.31219051016
ENSG00000211584	2.30482444254	2.76069362264	2.28503035269	2.92885493787	1.44315271237	1.68377980184	1.23450237495	0.996805093602
ENSG00000090339	5.04487326318	5.29192495275	7.92439217233	17.0337644673	13.0355065498	15.786868385	11.4426860241	20.1647883859
ENSG00000132563	2.98418016714	5.48597788102	5.48520770034	7.15225694283	1.54934423054	1.53771213514	3.26270064544	2.72897543925
ENSG00000112297	8.64354643537	12.652663459	9.35721671985	9.9123571776	5.61159455716	6.80336224814	4.38583643484	4.62526917571
ENSG00000167100	0.914420867443	1.24511798094	2.03283758539	1.0459447798	0.4975245298	0.445287789459	1.48782848913	1.09919373701
ENSG00000114784	19.8080315277	18.8139582248	18.3168577711	25.2517213376	36.8178954899	36.897756975	35.4390275021	49.6909366458
ENSG00000128016	24.8591976071	28.7761235478	32.7924511897	20.8262247085	24.7919049889	27.6983714299	21.2866191971	102.293536667
ENSG00000131979	0.745359077607	1.08051977771	0.760445604701	3.76583983524	2.62320491665	3.25339602517	1.91863230369	1.67138491904
ENSG00000162882	0.444236107949	0.940189561964	0.848014831625	1.44187185102	0.268614648523	0.360139495758	0.255988580455	0.642175880865
ENSG00000085185	2.23729688675	1.56276800169	3.03920181747	1.62457358325	2.27307319479	1.43819141525	1.76041276394	1.51252022206
ENSG00000120526	8.34184747848	4.6034102339	5.04103018308	6.41402898036	11.1908608317	10.5350573521	9.72829951733	9.68942102943
ENSG00000164188	0.0592619845248	0.297901266611	0.502996554007	1.68565709877	0.0422166749887	0.179248087894	0.0968551274092	0.0814712359582
ENSG00000170379	0.373822885325	0.40837689565	1.64731347052	0.242555805311	0.0800721533089	0.123580769203	0.718085431768	0.531267816315
ENSG00000177096	13.9686326908	16.1348182176	16.5047205413	19.7739926986	6.73784430991	8.92147984046	9.42935428793	8.68668665607
ENSG00000154640	17.5952531824	14.3939804458	15.2857744412	14.1376468366	28.4409321934	23.0557369719	23.9162439484	28.29863614
ENSG00000177283	1.46914645571	3.97764329302	2.89384116429	10.6080723508	1.27110293989	4.33705731904	2.20113183797	2.20359886691
ENSG00000103196	16.9139604214	23.5030509951	35.8724100094	3.80999509692	10.1438869514	9.55678600676	16.5739503964	19.9496032233
ENSG00000163738	0.559938971081	0.573667526951	0.342903372501	0.490387115271	0.968984078876	1.84881184664	1.16301553827	1.257665613
ENSG00000104783	0.33605211932	0.704256336206	0.463965557569	2.25439733425	0.198376918261	0.382182009308	0.102160089576	0.131640023234
ENSG00000103145	13.799299816	24.7879131471	48.2150181446	32.6071060696	13.7958583295	16.6310262805	44.7199481276	52.2541203098
ENSG00000226744	0.226120770463	0.256336371328	0.430854639998	0.770108580948	2.5231096619	3.5828051366	8.24555041841	3.32397274949
ENSG00000188487	0.155590998623	1.98452248067	1.47384204909	0.818192905137	0.283189373258	0.296612396332	0.238571660094	0.10875673699
ENSG00000111424	4.30446902728	5.94373456016	2.27536818168	6.07092843237	9.39552859538	11.1903205543	4.91208892991	4.00423839313
ENSG00000091844	2.25546571635	2.50869989724	2.49398899012	2.56655958616	1.27177389833	1.37164818381	1.68544579962	1.81987727282
ENSG00000021762	6.86166137998	11.0894154662	13.7689740574	7.59609697714	4.2219971119	5.08523530012	7.55885344287	6.17558210859
ENSG00000105664	0.13637589992	4.64729862139	19.1707574464	17.1263215225	0.0722319074732	0.12879466038	0.0415894623278	0.130315071023
ENSG00000276180	6.36566068647	6.551273449	7.85369290955	11.1905023471	7.71102899696	13.5823195945	14.4045430913	13.6482342725
ENSG00000254087	4.76740759214	6.33040840303	7.65742452851	2.85139591387	6.01841700438	7.83718061154	8.36289366437	7.21925222413
ENSG00000188613	0.487501212342	1.5711737409	1.63242816808	1.08586727409	0.129743804535	0.316426077109	0.271015559914	0.220410580711
ENSG00000055163	0.992269055048	0.791871918283	0.53244652752	0.92241698428	3.01330628738	1.83515964989	1.32789788963	1.03379492453
ENSG00000025434	2.43768567547	3.86251966781	3.64334238776	3.31586207274	1.71511304551	1.90056821264	2.11019260862	2.84664364814
ENSG00000196358	0.37473447512	1.20488937599	0.871454870861	1.21855055033	0.20364814106	0.562896111622	0.354368104521	0.417750003931
ENSG00000160712	1.87660204507	2.96778536314	1.88052933368	0.759784119281	1.02867953432	1.18201291847	0.679281308525	1.17870074804
ENSG00000178882	0.587674972792	0.154768209393	0.0791327355674	0.383113693038	0.714818454936	0.252886373181	0.62155726034	0.894165038241
ENSG00000168487	12.2945220979	17.5326678526	16.2951389163	11.4802404194	8.66297371752	8.84605492607	9.13946209321	11.4628324101
ENSG00000155961	0.0351731046986	0.0186943122369	0.018860855481	0.584977358152	0.191484134328	0.965656810265	0.458000007285	0.312835272231
ENSG00000073008	23.9299030281	15.272936905	13.5426006404	11.5628990274	44.2405907169	27.9616312277	18.2264135885	17.6771964947
ENSG00000180777	0.176469373929	0.128029118677	0.0787432883602	0.152579633616	0.759925872355	4.73852111947	0.497809326876	0.508364110825
ENSG00000104856	6.49605774945	8.20177073719	10.553605854	11.2529782557	10.7356650866	14.8643673165	18.6011420171	16.7191874144
ENSG00000125170	5.43494088067	4.72217181381	6.0829358452	4.04822945298	3.20374666684	1.92209413018	4.15859502953	3.54352249475
ENSG00000198807	4.62454228438	7.17996912042	6.33334900477	4.63241211307	3.84441648121	4.50220764521	3.73405053145	3.50872882362
ENSG00000197093	1.94771490109	3.99018345703	3.40305638811	3.33714636731	1.48170159382	2.39759909123	1.2348427308	1.21509654386
ENSG00000076356	2.10183812738	3.21111524197	2.42000929929	3.98904327675	1.61879847353	1.53191721297	1.1244574989	0.687196938003
ENSG00000196405	1.60265046847	1.76077581678	1.91516384639	1.70062070497	0.863799615334	0.778403014283	1.19442545656	1.87278466565
ENSG00000186654	2.58851268725	3.32210992358	4.21401595221	3.01976171778	1.49118726152	1.18878602601	3.44796791065	4.10516094673
ENSG00000124134	0.366863207701	0.793893846615	1.02116424396	0.669267679738	0.488087028419	0.300762142497	0.662973538411	0.180192242983
ENSG00000204291	11.1724614165	0.455015863752	0.386284613668	3.98178898358	10.1990026333	0.38656183017	0.240693628961	0.172578122279
ENSG00000115523	0.160362113714	12.1688991628	6.13705088944	0.173072931974	0.681937237456	2.12378282861	6.72980698712	11.6045944025
ENSG00000092969	8.06767109026	8.07659791805	8.48709221222	1.23047801599	20.3562986548	10.8731626454	9.44336771427	10.2709691635
ENSG00000214814	0.146123104199	0.704085184213	0.655803054463	1.52805691437	0.0579101257046	0.364007221754	0.159075089794	0.181863292594
ENSG00000189129	5.18420388345	6.01666979972	6.79735894046	11.2926510843	2.64048588398	2.39158916985	2.77414810055	2.08475064419
ENSG00000119699	0.556263050056	2.37088990983	4.08510378181	4.28397616174	0.33678795731	1.60171704033	1.42198308566	1.630935115
ENSG00000240583	9.06667741323	8.35025409042	6.31302495681	5.01023344024	0.871829729619	0.268276981663	0.282022852183	0.34047125614
ENSG00000108932	33.90738387	19.8874865661	15.8045148205	9.01951036088	33.9362164339	28.2467739096	30.2366389653	36.4599788929
ENSG00000145681	0.25586199802	2.07238198948	1.34675610466	1.25791417494	0.103601828513	0.3506752073	0.297566430899	0.122235257909
ENSG00000182492	10.7236648985	25.9428282657	32.914838497	44.1865140589	6.59224723245	13.3568861478	23.2035610654	15.4339561352
ENSG00000105088	1.14969618512	1.81127611964	2.33605367624	4.6788888779	0.987891616329	1.28677784933	3.62003339623	1.47597169786
ENSG00000181072	3.05002120204	0.592732796683	0.721135434164	0.202757454596	1.84340403618	0.567692389889	1.08836249788	0.875245053955
ENSG00000076716	0.437551773896	1.06755546471	4.754948964	1.48642557047	0.315032657725	0.605734878834	2.12218247223	0.942611828748
ENSG00000225968	2.700462649	4.51477347863	3.55843910088	5.53790544392	2.64330703398	5.35948822017	2.61322136515	0.841778460453
ENSG00000164220	14.5797403996	10.3739629578	6.9356311557	14.6568309029	7.53529689369	6.07766036512	3.99530077247	3.18996028452
ENSG00000006016	0.264346881462	0.435152559477	0.440102413954	0.848973853231	0.177520751585	0.11133148145	0.184415948668	0.0875527588021
ENSG00000106483	0.142871500455	0.490100897564	0.769661567071	1.16052857585	0.0786402993376	0.0616560884975	0.477480627011	1.07560698992
ENSG00000224259	0.175860150281	0.212681004087	0.53707696946	1.28961880395	0.0960677879922	0.457164738427	0.242986839389	0.170735045328
ENSG00000075618	110.648638662	110.359371628	98.6355361632	87.5095059702	45.5967576644	50.7421716455	77.3102147043	72.7699989894
ENSG00000181374	2.17329131782	3.86031840264	1.77507459176	0.741936693419	2.64132119969	3.16177203707	2.3553933359	5.39288214021
ENSG00000151789	0.129620999581	0.94194531929	0.9873248533	1.9476806794	0.117565916845	0.484807477806	0.70089802803	0.714865260571
ENSG00000138669	0.782353271852	0.686210467103	1.18324114375	1.55884525373	0.0681297865181	0.256725038701	0.275489993749	0.239502314925
ENSG00000133216	2.04143907218	1.94089355082	1.40406163568	3.13897358883	1.08576556857	1.32874909125	1.16258160075	0.718220410185
ENSG00000149633	0.121965716791	0.405967652374	0.356444365779	1.33963825187	0.07170331026	0.141065946137	0.254650634736	0.158229160686
ENSG00000118515	13.7203050527	5.5518888792	6.54066468041	3.64055885933	20.4460038644	15.9261432429	7.82022923174	13.2982070656
ENSG00000158445	0.0425693779818	0.120224195963	0.108442411448	0.135364894406	0.00435513581481	0.0266475427442	0.0145695278067	0.00689024861456
ENSG00000236393	0.923444273493	0.372662038427	0.259921432754	0.0747240750982	1.08148882423	0.9600892959	0.656843122998	0.709267943156
ENSG00000206190	4.31808261317	3.43195931274	2.8481626397	3.02350501771	3.28152122524	1.296297507	1.68918375986	0.616384074775
ENSG00000185567	18.0076906459	12.5197237267	13.3143218608	17.4780043534	5.65052276343	5.84081950582	6.3778457408	4.64886310762
ENSG00000185483	2.54060549102	3.09123639491	2.16217409836	2.90911997305	1.32945105287	1.11837410085	0.993473911342	0.746638962532
ENSG00000004776	0.807528060742	2.15541185071	2.85753513852	3.89927588794	0.65566902026	1.27532751575	1.6521130209	0.770033674422
ENSG00000100077	0.499381524464	0.378729081363	0.414540863501	0.189701840742	0.791406311982	0.624545108382	0.803922940071	0.633533654583
ENSG00000188643	52.6326791718	65.9710706524	68.1767108085	109.441157795	30.8282541937	38.147309723	38.9209838291	47.3355092954
ENSG00000243055	0.956065658647	1.61346978402	1.03396957748	0.224899753036	1.72931727882	2.04476022742	2.10794644417	3.66975566539
ENSG00000184640	34.5507874646	41.9198445347	48.9789351028	37.3590950978	22.7958128361	20.5387220218	37.4699694282	33.2261259788
ENSG00000149575	0.151477324856	0.218531717005	0.216453746706	0.317921590818	0.0569785165468	0.0297790962949	0.037937920082	0.0200585192297
ENSG00000143515	26.6417812807	25.5127373851	31.3618450304	28.4758080214	12.7839808835	12.720377733	18.5856521779	11.7998858508
ENSG00000154556	0.376496265986	0.585356919441	0.699436323541	0.190779709389	0.414634226144	0.980556049934	0.631365213714	0.821089308407
ENSG00000060140	0.66473862767	0.832241096865	0.480633675313	0.363132695487	0.878475955411	1.82882187332	1.2809966418	1.29513848265
ENSG00000164116	0.0231061372925	0.34378513351	0.171406697605	0.244797462272	0.0137701164283	0.0122040521902	0.00748020082774	0.0083231060087
ENSG00000082482	8.77097187834	20.7194553235	17.3017929661	24.6634339659	3.41470848916	10.8295874592	10.3398075712	7.59507763851
ENSG00000112319	2.570222097	3.9476114495	4.47690484359	2.00936936131	3.14102138756	7.26251150521	5.5868699041	4.96647851741
ENSG00000160161	0.37871719439	0.32623020945	0.466010363084	1.48218675655	0.370254038712	0.124919184085	0.238118488206	0.244797319731
ENSG00000187151	0.0230944477587	2.89037633992	3.03336833391	1.24523844032	0.0275313185907	0.292094053267	0.126700087038	0.0636776951038
ENSG00000031081	3.23374326564	4.14018534903	2.21613291749	2.83135325092	1.90751460017	4.185748219	1.70518725392	1.07078623212
ENSG00000151490	1.19904531731	0.658280086765	1.47800249549	0.732017334687	1.64924713698	1.22043013592	2.57423947393	1.79364623528
ENSG00000143341	0.518996101223	0.707226677746	1.17227397594	2.10620345336	0.244933149068	0.352308563608	0.843248201244	0.593250780309
ENSG00000134242	0.278338177056	0.914384771025	0.653564479428	0.460234379828	0.298141331854	1.44120999262	1.2931459023	2.38025665506
ENSG00000151320	0.0481323546155	0.073806111343	0.0827199401722	0.288776267795	0.0423715608452	0.106543819127	0.0614221919023	0.0523499781723
ENSG00000100626	0.0313931012265	0.167737808962	0.112338094063	0.405683696544	0.0118699737941	0.0192173152913	0.0223077688102	0.0263005827407
ENSG00000172137	1.12201098613	1.50747701885	1.14891985712	3.27227647108	1.64312457864	1.28767631757	3.15384175855	4.39275419266
ENSG00000181104	104.094948022	112.476613211	74.31325884	121.568994292	61.7831477978	58.2085970404	45.1000033723	46.7862801929
ENSG00000256292	0.0	0.229035838616	0.436809637285	0.227637207287	0.125261159092	1.35258410499	1.29470559839	2.94019087953
ENSG00000127920	65.5279572042	51.7473287139	70.216724076	57.9227003187	93.159153668	84.1754430206	113.948833145	123.608805392
ENSG00000182704	5.34273309821	7.75144237394	17.2854250722	8.84416206387	4.40905783463	6.75648096988	9.70783944855	8.40679636727
ENSG00000178538	0.0165085383368	0.247520885403	0.0233158259733	0.0218173031666	0.0548536519365	0.303788352551	0.226421545156	0.457282449844
ENSG00000122877	0.0484975444571	0.451189173754	0.222236065624	2.62760463787	0.181080313459	0.421107308232	0.315007109761	0.440623989049
ENSG00000113749	0.182043307378	0.276328907907	0.498993177154	0.419279287854	0.0979995620789	0.0994403164579	0.193340951709	0.102058708424
ENSG00000137267	37.9626017552	27.506187848	28.4586585724	32.2482439126	19.9969461986	26.6183144569	20.6726334651	16.7984954249
ENSG00000177337	1.54827706191	2.22549392076	1.98485654458	1.699871143	1.73864289575	2.56455191838	2.31586717765	3.39429656353
ENSG00000137266	1.17777455269	1.57686998168	2.68958017372	2.20622794397	1.17837182722	1.24558603381	1.03637554275	1.03640725296
ENSG00000135074	2.63165757469	1.91131531716	0.740917365687	1.38525481954	1.34289900852	0.679013751573	0.592027813541	0.384207865271
ENSG00000131620	0.300951834647	0.15357046467	0.143813109027	0.816410707292	0.121389826959	0.0135824234908	0.0963722715547	0.170028184008
ENSG00000137124	10.9989144981	21.5123503167	12.5131130537	21.2106591099	8.04611987892	15.8984972642	9.20998200466	5.14097139607
ENSG00000249684	0.479516165454	1.10425301616	0.644689405281	1.25892606714	0.152472200497	0.188201142998	0.275920623381	0.203874951179
ENSG00000170558	4.77865854866	3.21799037601	2.02749709279	4.32068797472	3.31716795065	4.78660905607	2.03321817395	1.29786037582
ENSG00000124225	2.00526015863	4.75664099598	3.23173239354	6.05199481948	2.57294001268	0.946923050623	2.97525642279	1.69135840937
ENSG00000156234	0.0	0.119050501338	0.378544626522	0.60046025244	0.0	0.0	0.0	0.0
ENSG00000165071	0.84005119843	1.05130437352	1.08861618295	0.506894394861	2.0118633086	2.81125995921	2.26157229369	3.10595265413
ENSG00000188766	0.773468306149	1.01236822983	1.38391890461	2.09354281692	1.18149260278	1.12523757799	1.39240971793	0.957733386084
ENSG00000186684	0.0645004849749	0.243820342317	0.251314270683	0.299575171605	0.0503920053348	0.0566279190687	0.086331333294	0.0179750341778
ENSG00000103647	0.752922115352	1.02131198879	1.02484941206	1.77998473846	0.747415373363	0.702174560369	0.657243759917	0.921126583075
ENSG00000160460	0.218722796768	0.207953069762	0.448626637442	0.425796333913	0.241984768488	0.140027300137	0.358538221318	0.408289635972
ENSG00000177990	0.629041812946	0.63184411169	0.913764464174	0.504768283031	0.91404005211	1.44166713091	1.1014373223	1.35287627946
ENSG00000224596	0.393186269658	1.44909384633	1.05976458309	0.591033704149	1.23543400515	1.18380310443	1.26262417597	2.2267844267
ENSG00000154265	0.796055463199	0.642363764923	0.878462981573	0.735656519211	0.495051441443	0.822217868183	1.01469044923	1.85487301456
ENSG00000071909	0.430229665645	0.55332561779	1.29609793559	0.214443205187	0.47761880595	0.786568338285	1.20281627285	1.43093498869
ENSG00000258788	2.81186892125	6.16418127968	2.86515314915	0.350846292977	5.92903977947	7.46404852965	6.50265551883	7.49773596383
ENSG00000163145	0.00614312015727	0.0173022170695	0.062266795471	0.143009702584	0.0044860843489	0.00411313089477	0.00270669330354	0.0
ENSG00000138380	0.63150096632	0.836823593803	0.95906884863	0.859599662478	0.683003182377	1.14494038156	1.22257758502	1.43190311162
ENSG00000226674	0.17606968792	0.309711909697	0.299113025655	0.207557857782	0.345722482386	0.694627440209	0.659385840049	0.46306896149
ENSG00000102452	0.0930982173731	0.204808605873	0.183964423669	0.348310780327	0.11915005904	0.107201212774	0.072796931445	0.0542551400207
ENSG00000103995	1.22315453934	0.878079152119	1.28535304331	0.731811829966	1.7308254859	1.89747763171	2.4528673051	2.87391434372
ENSG00000213722	21.4532537385	25.2071861263	25.2818329013	28.6014411271	9.50864242041	12.5468657055	15.0636087694	15.3440701691
